# Supplementary material for: Single-cell tumor microenvironment profiling informs a circulating proteome test for the interception of malignant transformation in NF1 nerve sheath tumors
Source: Research Square preprint supplement (doi:10.21203/rs.3.rs-6865989/v1), 2025-06-18
Supplement: Supplementary file 1 [file 1b36e21c7a22923a8df111ea.xlsx]

## Sheet: Sheet1
Supplementary Table 4. GO terms from enrichment analysis of 127 scRNAseq-identified candidate MPNST markers
Category	Term	Count	%	PValue	Genes	List Total	Pop Hits	Pop Total	Fold Enrichment	Bonferroni	Benjamini	FDR
GOTERM_BP_DIRECT	GO:0006954~inflammatory response	17	13.4921	1.27163e-08	GGT5, SMAD1, CEBPB, CD40, VCAM1, LXN, RARRES2, F2R, PLA2G2A, LY96, PARK7, MIF, CXCL13, CCL7, CCL5, CHI3L1, LAT	125	424	19416	6.22777	1.66456e-05	1.66457e-05	1.60099e-05
GOTERM_BP_DIRECT	GO:0043410~positive regulation of MAPK cascade	12	9.52381	4.48071e-08	NTRK2, CD74, CD40, BANK1, GDF15, IGFBP3, F2R, PDGFA, IGFBP6, LAT, SOD1, VEGFA	125	193	19416	9.6577	5.86507e-05	1.98417e-05	1.90838e-05
GOTERM_BP_DIRECT	GO:0006955~immune response	18	14.2857	4.54737e-08	IL32, CD74, CEBPB, GZMA, CXCL13, CST7, HLA-E, CD79B, FCER2, CD8A, CCL5, ENPP2, HLA-DRA, CD48, GBP2, IL7R, LAT, CD22	125	529	19416	5.28526	5.95233e-05	1.98417e-05	1.90838e-05
GOTERM_BP_DIRECT	GO:0070374~positive regulation of ERK1 and ERK2 cascade	11	8.73016	7.93052e-07	PDGFRB, ACTA2, CD74, F2R, PLA2G2A, PDGFA, CHI3L1, GCG, MIF, GAS6, VEGFA	125	205	19416	8.33467	0.00103757	0.000259526	0.000249613
GOTERM_BP_DIRECT	GO:0007165~signal transduction	25	19.8413	2.98105e-06	STC1, LSP1, NDRG1, TYMP, CD79B, LGALS1, CCL7, MDK, SIT1, IGFBP6, TIMP1, S100A11, IL32, PDGFRB, SMAD1, NPM1, ANGPT2, GDF15, PLAUR, PGF, CD48, IL7R, GAS6, NBL1, LAT	125	1326	19416	2.92851	0.00389459	0.000780439	0.000750628
GOTERM_BP_DIRECT	GO:0051897~positive regulation of phosphatidylinositol 3-kinase/protein kinase B signal transduction	10	7.93651	4.72983e-06	PDGFRB, NTRK2, GDF15, CCL5, F2R, PDGFA, CHI3L1, PARK7, GAS6, VEGFA	125	196	19416	7.9249	0.00617224	0.00103189	0.000992476
GOTERM_BP_DIRECT	GO:0071356~cellular response to tumor necrosis factor	8	6.34921	7.163e-06	COL1A1, SFRP1, CD40, VCAM1, FABP4, CCL5, CHI3L1, GBP2	125	111	19416	11.1948	0.00933258	0.00133948	0.00128832
GOTERM_BP_DIRECT	GO:0050918~positive chemotaxis	6	4.7619	1.81925e-05	CCL5, S100A4, MIF, CORO1A, PGF, VEGFA	125	51	19416	18.2739	0.0235329	0.0026514	0.00255012
GOTERM_BP_DIRECT	GO:0006935~chemotaxis	8	6.34921	1.82296e-05	PDGFRB, CCL7, CCL5, RARRES2, ENPP2, PLAUR, LSP1, TYMP	125	128	19416	9.708	0.0235803	0.0026514	0.00255012
GOTERM_BP_DIRECT	GO:0043066~negative regulation of apoptotic process	14	11.1111	2.15921e-05	CD74, NPM1, PLAUR, HSPB1, GCG, MIF, VEGFA, COMP, SFRP1, KRT18, CD27, TIMP1, GAS6, TPT1	125	506	19416	4.29761	0.0278687	0.00282641	0.00271845
GOTERM_BP_DIRECT	GO:0008284~positive regulation of cell population proliferation	14	11.1111	2.39236e-05	PDGFRB, NTRK2, NPM1, F2R, PDGFA, PTN, MIF, PGF, VEGFA, SFRP1, IFNG, TIMP1, IL7R, CRLF1	125	511	19416	4.25556	0.030831	0.0028469	0.00273816
GOTERM_BP_DIRECT	GO:0050863~regulation of T cell activation	4	3.1746	2.95272e-05	SIT1, CCL5, CRTAM, LAT	125	10	19416	62.1312	0.0379143	0.00322093	0.0030979
GOTERM_BP_DIRECT	GO:0007155~cell adhesion	14	11.1111	4.47866e-05	IL32, COL18A1, VCAM1, MCAM, DPT, ICAM3, THY1, COL1A1, COMP, VCAN, FAP, COL6A3, MFGE8, CD22	125	543	19416	4.00477	0.0569415	0.0044001	0.00423203
GOTERM_BP_DIRECT	GO:0001934~positive regulation of protein phosphorylation	9	7.14286	4.85719e-05	NTRK2, CD74, CD40, CD6, RARRES2, PLAUR, GAS6, PGF, VEGFA	125	203	19416	6.88646	0.061603	0.0044001	0.00423203
GOTERM_BP_DIRECT	GO:0001525~angiogenesis	10	7.93651	5.04213e-05	PDGFRB, COL18A1, ANGPT2, FAP, MCAM, PDGFA, THY1, MFGE8, TYMP, VEGFA	125	264	19416	5.88364	0.0638721	0.0044001	0.00423203
GOTERM_BP_DIRECT	GO:0043524~negative regulation of neuron apoptotic process	8	6.34921	6.22013e-05	NTRK2, CEBPB, MDK, F2R, PARK7, CORO1A, CRLF1, SOD1	125	155	19416	8.01693	0.0781973	0.00508884	0.00489446
GOTERM_BP_DIRECT	GO:0009615~response to virus	7	5.55556	7.48565e-05	ACTA2, BST2, IFNG, CCL5, HSPB1, ENO1, TPT1	125	110	19416	9.88451	0.0933428	0.00576395	0.00554378
GOTERM_BP_DIRECT	GO:0051781~positive regulation of cell division	5	3.96825	0.000268856	MDK, PDGFA, PTN, PGF, VEGFA	125	49	19416	15.8498	0.296705	0.0195518	0.018805
GOTERM_BP_DIRECT	GO:0007166~cell surface receptor signaling pathway	10	7.93651	0.000426422	LAG3, IFNG, KLRB1, CD8A, LY96, CD27, MIF, CXCL13, IL7R, GAS6	125	351	19416	4.4253	0.427822	0.0293782	0.0282561
GOTERM_BP_DIRECT	GO:0008285~negative regulation of cell population proliferation	11	8.73016	0.000483281	SMAD1, COL18A1, NPM1, SFRP1, TNFRSF9, IGFBP3, F2R, DPT, IGFBP6, NDRG1, S100A11	125	435	19416	3.92783	0.46888	0.0308403	0.0296623
GOTERM_BP_DIRECT	GO:0030335~positive regulation of cell migration	9	7.14286	0.000494764	PDGFRB, COL1A1, CCL7, MDK, CCL5, MCAM, F2R, PDGFA, VEGFA	125	285	19416	4.90509	0.476808	0.0308403	0.0296623
GOTERM_BP_DIRECT	GO:0045766~positive regulation of angiogenesis	7	5.55556	0.000651092	SMOC2, CD40, ANGPT2, HSPB1, CHI3L1, PGF, VEGFA	125	164	19416	6.62985	0.573676	0.03874	0.0372602
GOTERM_BP_DIRECT	GO:0050729~positive regulation of inflammatory response	6	4.7619	0.000731834	CEBPB, LGALS1, FABP4, IFNG, MDK, PLA2G2A	125	111	19416	8.39611	0.616464	0.039934	0.0384086
GOTERM_BP_DIRECT	GO:0007267~cell-cell signaling	8	6.34921	0.000732173	CCL7, GDF15, CCL5, PDGFA, ANGPTL2, THY1, CXCL13, PGF	125	232	19416	5.35614	0.616634	0.039934	0.0384086
GOTERM_BP_DIRECT	GO:0045087~innate immune response	12	9.52381	0.000987534	BST2, LAG3, CD6, NPY, RARRES2, LY96, MIF, GBP2, CORO1A, CD55, WFDC2, HLA-E	125	564	19416	3.30485	0.725642	0.0517073	0.0497322
GOTERM_BP_DIRECT	GO:0043567~regulation of insulin-like growth factor receptor signaling pathway	3	2.38095	0.00110474	IGFBP3, IGFBP2, IGFBP6	125	8	19416	58.248	0.764703	0.0556196	0.0534951
GOTERM_BP_DIRECT	GO:0060346~bone trabecula formation	3	2.38095	0.00141445	COL1A1, SFRP1, VEGFA	125	9	19416	51.776	0.843207	0.0685747	0.0659553
GOTERM_BP_DIRECT	GO:0010628~positive regulation of gene expression	11	8.73016	0.00150108	IL32, ACTA2, NTRK2, SMAD1, CD74, IFNG, PARK7, VIM, IL7R, GAS6, VEGFA	125	505	19416	3.38338	0.860039	0.0701755	0.067495
GOTERM_BP_DIRECT	GO:0070233~negative regulation of T cell apoptotic process	3	2.38095	0.00176068	CCL5, CD27, IL7R	125	10	19416	46.5984	0.900417	0.0794736	0.0764379
GOTERM_BP_DIRECT	GO:0001649~osteoblast differentiation	6	4.7619	0.00187051	COL1A1, SMAD1, SFRP1, VCAN, IGFBP3, IGFBP2	125	137	19416	6.80269	0.913774	0.0803219	0.0772538
GOTERM_BP_DIRECT	GO:0098609~cell-cell adhesion	7	5.55556	0.0019022	KRT18, LGALS1, VCAM1, ICAM3, THY1, S100A11, VEGFA	125	202	19416	5.38265	0.917285	0.0803219	0.0772538
GOTERM_BP_DIRECT	GO:0050830~defense response to Gram-positive bacterium	6	4.7619	0.00205646	NPY, RARRES2, PLA2G2A, IL7R, GBP2, HLA-E	125	140	19416	6.65691	0.932436	0.0818009	0.0786764
GOTERM_BP_DIRECT	GO:0050731~positive regulation of peptidyl-tyrosine phosphorylation	5	3.96825	0.00206221	CD74, BANK1, ENPP2, MIF, VEGFA	125	84	19416	9.24571	0.932943	0.0818009	0.0786764
GOTERM_BP_DIRECT	GO:0042113~B cell activation	4	3.1746	0.00227039	BST2, CD40, BANK1, CD22	125	41	19416	15.154	0.948969	0.0874099	0.0840711
GOTERM_BP_DIRECT	GO:0031640~killing of cells of another organism	5	3.96825	0.00298634	GZMA, PLA2G2A, GZMB, CXCL13, GZMH	125	93	19416	8.35097	0.980059	0.111689	0.107423
GOTERM_BP_DIRECT	GO:0043123~positive regulation of canonical NF-kappaB signal transduction	7	5.55556	0.00332442	BST2, CD74, CD40, LGALS1, F2R, S100A4, VEGFA	125	226	19416	4.81104	0.987208	0.115767	0.111345
GOTERM_BP_DIRECT	GO:0019882~antigen processing and presentation	4	3.1746	0.00335883	CD74, CD8A, HLA-DRA, HLA-E	125	47	19416	13.2194	0.987773	0.115767	0.111345
GOTERM_BP_DIRECT	GO:0002250~adaptive immune response	10	7.93651	0.0033607	CD79B, LAG3, IFNG, CD6, SIT1, CD8A, CRTAM, HLA-DRA, LAT, HLA-E	125	473	19416	3.28389	0.987803	0.115767	0.111345
GOTERM_BP_DIRECT	GO:2001028~positive regulation of endothelial cell chemotaxis	3	2.38095	0.00350147	SMOC2, HSPB1, VEGFA	125	14	19416	33.2846	0.989862	0.117524	0.113035
GOTERM_BP_DIRECT	GO:0007596~blood coagulation	5	3.96825	0.00401629	ANGPT2, PLAUR, ANGPTL2, PLAT, GAS6	125	101	19416	7.6895	0.994846	0.131433	0.126413
GOTERM_BP_DIRECT	GO:0051603~proteolysis involved in protein catabolic process	4	3.1746	0.00447323	FAP, GZMA, GZMB, CTSB	125	52	19416	11.9483	0.997173	0.142711	0.13726
GOTERM_BP_DIRECT	GO:0090280~positive regulation of calcium ion import	3	2.38095	0.00457896	PDGFRB, STC1, GCG	125	16	19416	29.124	0.99754	0.142711	0.13726
GOTERM_BP_DIRECT	GO:0048146~positive regulation of fibroblast proliferation	4	3.1746	0.00471976	CD74, PDGFA, MIF, GAS6	125	53	19416	11.7229	0.997956	0.143678	0.13819
GOTERM_BP_DIRECT	GO:2000573~positive regulation of DNA biosynthetic process	3	2.38095	0.00516789	PDGFRB, SMOC2, VEGFA	125	17	19416	27.4108	0.998866	0.152341	0.146522
GOTERM_BP_DIRECT	GO:0097191~extrinsic apoptotic signaling pathway	4	3.1746	0.0052371	SFRP1, KRT18, IFNG, CD27	125	55	19416	11.2966	0.998965	0.152341	0.146522
GOTERM_BP_DIRECT	GO:0006874~intracellular calcium ion homeostasis	5	3.96825	0.0054355	CD40, CCL7, CCL5, STC1, TPT1	125	110	19416	7.06036	0.999203	0.153405	0.147545
GOTERM_BP_DIRECT	GO:0071347~cellular response to interleukin-1	4	3.1746	0.00550805	SFRP1, CD40, CCL5, GBP2	125	56	19416	11.0949	0.999275	0.153405	0.147545
GOTERM_BP_DIRECT	GO:0009612~response to mechanical stimulus	4	3.1746	0.00607486	COL1A1, ANGPT2, IGFBP2, CHI3L1	125	58	19416	10.7123	0.999656	0.164602	0.158314
GOTERM_BP_DIRECT	GO:0032760~positive regulation of tumor necrosis factor production	5	3.96825	0.00616156	IFNG, HSPB1, LY96, MIF, HLA-E	125	114	19416	6.81263	0.999694	0.164602	0.158314
GOTERM_BP_DIRECT	GO:0006915~apoptotic process	11	8.73016	0.00644095	COMP, LGALS1, IFNG, TNFRSF9, GZMA, IGFBP3, GZMB, CHI3L1, GZMH, SOD1, VEGFA	125	620	19416	2.75582	0.999788	0.165395	0.159077
GOTERM_BP_DIRECT	GO:0043277~apoptotic cell clearance	3	2.38095	0.00644395	TIMD4, MFGE8, GAS6	125	19	19416	24.5255	0.999789	0.165395	0.159077
GOTERM_BP_DIRECT	GO:0060348~bone development	4	3.1746	0.00667529	SMAD1, BGN, PDGFA, STC1	125	60	19416	10.3552	0.999844	0.168038	0.161619
GOTERM_BP_DIRECT	GO:0042531~positive regulation of tyrosine phosphorylation of STAT protein	4	3.1746	0.00698828	CD40, IFNG, CCL5, CRLF1	125	61	19416	10.1854	0.999897	0.172597	0.166005
GOTERM_BP_DIRECT	GO:0030336~negative regulation of cell migration	6	4.7619	0.00718733	BST2, CD74, SFRP1, STC1, MIF, THY1	125	188	19416	4.95728	0.999921	0.173974	0.167329
GOTERM_BP_DIRECT	GO:0042102~positive regulation of T cell proliferation	4	3.1746	0.00730985	VCAM1, CD6, CCL5, CORO1A	125	62	19416	10.0212	0.999933	0.173974	0.167329
GOTERM_BP_DIRECT	GO:0014911~positive regulation of smooth muscle cell migration	3	2.38095	0.00784802	PDGFRB, CCL5, S100A11	125	21	19416	22.1897	0.999967	0.177122	0.170356
GOTERM_BP_DIRECT	GO:0010759~positive regulation of macrophage chemotaxis	3	2.38095	0.00784802	MDK, CCL5, RARRES2	125	21	19416	22.1897	0.999967	0.177122	0.170356
GOTERM_BP_DIRECT	GO:0097696~cell surface receptor signaling pathway via STAT	3	2.38095	0.00784802	IFNG, CCL5, CRLF1	125	21	19416	22.1897	0.999967	0.177122	0.170356
GOTERM_BP_DIRECT	GO:0009887~animal organ morphogenesis	5	3.96825	0.00825212	COMP, COL18A1, COL9A1, PDGFA, NBL1	125	124	19416	6.26323	0.999981	0.181659	0.17472
GOTERM_BP_DIRECT	GO:0032757~positive regulation of interleukin-8 production	4	3.1746	0.00832662	CD74, F2R, CHI3L1, PARK7	125	65	19416	9.55865	0.999982	0.181659	0.17472
GOTERM_BP_DIRECT	GO:0030199~collagen fibril organization	4	3.1746	0.00904835	COL1A1, COMP, COL18A1, DPT	125	67	19416	9.27331	0.999993	0.194169	0.186752
GOTERM_BP_DIRECT	GO:0042110~T cell activation	4	3.1746	0.00942252	LAG3, CD8A, CD27, LAT	125	68	19416	9.13694	0.999996	0.195779	0.188301
GOTERM_BP_DIRECT	GO:0001819~positive regulation of cytokine production	4	3.1746	0.00942252	IFNG, CRTAM, MIF, SOD1	125	68	19416	9.13694	0.999996	0.195779	0.188301
GOTERM_BP_DIRECT	GO:0033138~positive regulation of peptidyl-serine phosphorylation	4	3.1746	0.0101977	NTRK2, GCG, PARK7, MIF	125	70	19416	8.87589	0.999999	0.208575	0.200608
GOTERM_BP_DIRECT	GO:0048844~artery morphogenesis	3	2.38095	0.0110266	COMP, NOTCH3, VEGFA	125	25	19416	18.6394	1	0.218695	0.210341
GOTERM_BP_DIRECT	GO:0046697~decidualization	3	2.38095	0.0110266	STC1, PTN, CTSB	125	25	19416	18.6394	1	0.218695	0.210341
GOTERM_BP_DIRECT	GO:0009653~anatomical structure morphogenesis	5	3.96825	0.0115992	SMAD1, KRT18, MCAM, F2R, DKK3	125	137	19416	5.66891	1	0.226617	0.217961
GOTERM_BP_DIRECT	GO:0043491~phosphatidylinositol 3-kinase/protein kinase B signal transduction	4	3.1746	0.0127405	CD40, BANK1, COL6A3, GAS6	125	76	19416	8.17516	1	0.234808	0.225839
GOTERM_BP_DIRECT	GO:0045954~positive regulation of natural killer cell mediated cytotoxicity	3	2.38095	0.0127945	LAG3, CRTAM, HLA-E	125	27	19416	17.2587	1	0.234808	0.225839
GOTERM_BP_DIRECT	GO:0034341~response to type II interferon	3	2.38095	0.0127945	BST2, CD74, CD40	125	27	19416	17.2587	1	0.234808	0.225839
GOTERM_BP_DIRECT	GO:0051894~positive regulation of focal adhesion assembly	3	2.38095	0.0127945	SFRP1, THY1, VEGFA	125	27	19416	17.2587	1	0.234808	0.225839
GOTERM_BP_DIRECT	GO:0006508~proteolysis	10	7.93651	0.0129154	GGT5, FAP, CPE, GZMB, PCOLCE, PLAT, PARK7, WFDC2, CTSB, GZMH	125	586	19416	2.65065	1	0.234808	0.225839
GOTERM_BP_DIRECT	GO:0032496~response to lipopolysaccharide	5	3.96825	0.0140375	CEBPB, VCAM1, CD6, F2R, LY96	125	145	19416	5.35614	1	0.251714	0.242099
GOTERM_BP_DIRECT	GO:0007631~feeding behavior	3	2.38095	0.0156606	NTRK2, NPY, GCG	125	30	19416	15.5328	1	0.277023	0.266441
GOTERM_BP_DIRECT	GO:0048010~vascular endothelial growth factor receptor signaling pathway	3	2.38095	0.0166714	HSPB1, PGF, VEGFA	125	31	19416	15.0317	1	0.289	0.277961
GOTERM_BP_DIRECT	GO:0090090~negative regulation of canonical Wnt signaling pathway	5	3.96825	0.0167792	SFRP1, MDK, IGFBP2, IGFBP6, DKK3	125	153	19416	5.07608	1	0.289	0.277961
GOTERM_BP_DIRECT	GO:0035924~cellular response to vascular endothelial growth factor stimulus	3	2.38095	0.0187742	VCAM1, HSPB1, VEGFA	125	33	19416	14.1207	1	0.303917	0.292308
GOTERM_BP_DIRECT	GO:0044344~cellular response to fibroblast growth factor stimulus	3	2.38095	0.0187742	COL1A1, SFRP1, CCL5	125	33	19416	14.1207	1	0.303917	0.292308
GOTERM_BP_DIRECT	GO:0048008~platelet-derived growth factor receptor signaling pathway	3	2.38095	0.0187742	PDGFRB, PDGFA, PLAT	125	33	19416	14.1207	1	0.303917	0.292308
GOTERM_BP_DIRECT	GO:0038091~positive regulation of cell proliferation by VEGF-activated platelet derived growth factor receptor signaling pathway	2	1.5873	0.0190383	PDGFRB, VEGFA	125	3	19416	103.552	1	0.303917	0.292308
GOTERM_BP_DIRECT	GO:0035793~positive regulation of metanephric mesenchymal cell migration by platelet-derived growth factor receptor-beta signaling pathway	2	1.5873	0.0190383	PDGFRB, PDGFA	125	3	19416	103.552	1	0.303917	0.292308
GOTERM_BP_DIRECT	GO:0099183~trans-synaptic signaling by BDNF, modulating synaptic transmission	2	1.5873	0.0190383	NTRK2, PLAT	125	3	19416	103.552	1	0.303917	0.292308
GOTERM_BP_DIRECT	GO:0030225~macrophage differentiation	3	2.38095	0.0221251	NPM1, IFNG, VEGFA	125	36	19416	12.944	1	0.344782	0.331613
GOTERM_BP_DIRECT	GO:0048873~homeostasis of number of cells within a tissue	3	2.38095	0.0221251	F2R, CORO1A, VEGFA	125	36	19416	12.944	1	0.344782	0.331613
GOTERM_BP_DIRECT	GO:0030198~extracellular matrix organization	5	3.96825	0.0227734	COL1A1, COL18A1, SMOC2, CCDC80, COL9A1	125	168	19416	4.62286	1	0.346484	0.333249
GOTERM_BP_DIRECT	GO:0043029~T cell homeostasis	3	2.38095	0.023293	SIT1, IL7R, CORO1A	125	37	19416	12.5942	1	0.346484	0.333249
GOTERM_BP_DIRECT	GO:0042542~response to hydrogen peroxide	3	2.38095	0.023293	COL1A1, PARK7, SOD1	125	37	19416	12.5942	1	0.346484	0.333249
GOTERM_BP_DIRECT	GO:0001657~ureteric bud development	3	2.38095	0.023293	SMAD1, SFRP1, CRLF1	125	37	19416	12.5942	1	0.346484	0.333249
GOTERM_BP_DIRECT	GO:0043547~positive regulation of GTPase activity	4	3.1746	0.0236304	SFRP1, CD40, F2R, THY1	125	96	19416	6.472	1	0.347553	0.334277
GOTERM_BP_DIRECT	GO:0045582~positive regulation of T cell differentiation	3	2.38095	0.0244859	CD74, MDK, CD27	125	38	19416	12.2627	1	0.356133	0.34253
GOTERM_BP_DIRECT	GO:2000516~positive regulation of CD4-positive, alpha-beta T cell activation	2	1.5873	0.0253042	HLA-DRA, CD55	125	4	19416	77.664	1	0.356163	0.342559
GOTERM_BP_DIRECT	GO:0051917~regulation of fibrinolysis	2	1.5873	0.0253042	FAP, PLAUR	125	4	19416	77.664	1	0.356163	0.342559
GOTERM_BP_DIRECT	GO:0002906~negative regulation of mature B cell apoptotic process	2	1.5873	0.0253042	CD74, MIF	125	4	19416	77.664	1	0.356163	0.342559
GOTERM_BP_DIRECT	GO:0050776~regulation of immune response	3	2.38095	0.0257032	LAG3, CD40, CD22	125	39	19416	11.9483	1	0.357931	0.344259
GOTERM_BP_DIRECT	GO:0043588~skin development	3	2.38095	0.0269448	COL1A1, COMP, PDGFA	125	40	19416	11.6496	1	0.367403	0.353369
GOTERM_BP_DIRECT	GO:2000117~negative regulation of cysteine-type endopeptidase activity	3	2.38095	0.0269448	PLAUR, GAS6, VEGFA	125	40	19416	11.6496	1	0.367403	0.353369
GOTERM_BP_DIRECT	GO:0001666~response to hypoxia	5	3.96825	0.0274096	VCAM1, ANGPT2, PLAT, PGF, VEGFA	125	178	19416	4.36315	1	0.369889	0.35576
GOTERM_BP_DIRECT	GO:0001541~ovarian follicle development	3	2.38095	0.0282101	CEBPB, SOD1, VEGFA	125	41	19416	11.3655	1	0.376807	0.362414
GOTERM_BP_DIRECT	GO:0032956~regulation of actin cytoskeleton organization	4	3.1746	0.0297585	PDGFRB, BST2, PDGFA, CORO1A	125	105	19416	5.91726	1	0.393474	0.378444
GOTERM_BP_DIRECT	GO:0002248~connective tissue replacement involved in inflammatory response wound healing	2	1.5873	0.0315304	F2R, TIMP1	125	5	19416	62.1312	1	0.400711	0.385405
GOTERM_BP_DIRECT	GO:0002317~plasma cell differentiation	2	1.5873	0.0315304	LGALS1, ITM2A	125	5	19416	62.1312	1	0.400711	0.385405
GOTERM_BP_DIRECT	GO:0034112~positive regulation of homotypic cell-cell adhesion	2	1.5873	0.0315304	CCL5, PLAUR	125	5	19416	62.1312	1	0.400711	0.385405
GOTERM_BP_DIRECT	GO:0014829~vascular associated smooth muscle contraction	2	1.5873	0.0315304	ACTA2, COMP	125	5	19416	62.1312	1	0.400711	0.385405
GOTERM_BP_DIRECT	GO:0030154~cell differentiation	10	7.93651	0.0320831	NTRK2, SMAD1, SFRP1, ANGPT2, MDK, RARRES2, DLK1, PGF, TYMP, VEGFA	125	687	19416	2.26096	1	0.403815	0.38839
GOTERM_BP_DIRECT	GO:0032735~positive regulation of interleukin-12 production	3	2.38095	0.0335028	CD40, IFNG, MDK	125	45	19416	10.3552	1	0.417668	0.401714
GOTERM_BP_DIRECT	GO:0050796~regulation of insulin secretion	3	2.38095	0.034882	IFNG, CCL5, GCG	125	46	19416	10.1301	1	0.429319	0.41292
GOTERM_BP_DIRECT	GO:0030890~positive regulation of B cell proliferation	3	2.38095	0.036283	CD74, CD40, MIF	125	47	19416	9.91455	1	0.429319	0.41292
GOTERM_BP_DIRECT	GO:0006094~gluconeogenesis	3	2.38095	0.036283	GCG, ENO1, ENO2	125	47	19416	9.91455	1	0.429319	0.41292
GOTERM_BP_DIRECT	GO:0042130~negative regulation of T cell proliferation	3	2.38095	0.0377055	CEBPB, PLA2G2A, HLA-E	125	48	19416	9.708	1	0.429319	0.41292
GOTERM_BP_DIRECT	GO:1902177~positive regulation of oxidative stress-induced intrinsic apoptotic signaling pathway	2	1.5873	0.0377171	PARK7, SOD1	125	6	19416	51.776	1	0.429319	0.41292
GOTERM_BP_DIRECT	GO:2000503~positive regulation of natural killer cell chemotaxis	2	1.5873	0.0377171	CCL7, CCL5	125	6	19416	51.776	1	0.429319	0.41292
GOTERM_BP_DIRECT	GO:0051712~positive regulation of killing of cells of another organism	2	1.5873	0.0377171	FCER2, IFNG	125	6	19416	51.776	1	0.429319	0.41292
GOTERM_BP_DIRECT	GO:0060754~positive regulation of mast cell chemotaxis	2	1.5873	0.0377171	PGF, VEGFA	125	6	19416	51.776	1	0.429319	0.41292
GOTERM_BP_DIRECT	GO:0033634~positive regulation of cell-cell adhesion mediated by integrin	2	1.5873	0.0377171	CCL5, CXCL13	125	6	19416	51.776	1	0.429319	0.41292
GOTERM_BP_DIRECT	GO:0035754~B cell chemotaxis	2	1.5873	0.0377171	CXCL13, GAS6	125	6	19416	51.776	1	0.429319	0.41292
GOTERM_BP_DIRECT	GO:0071222~cellular response to lipopolysaccharide	5	3.96825	0.0382666	CD40, LY96, VIM, CXCL13, GBP2	125	198	19416	3.92242	1	0.431818	0.415324
GOTERM_BP_DIRECT	GO:0009617~response to bacterium	4	3.1746	0.0391061	FABP4, CCDC80, BANK1, GZMA	125	117	19416	5.31036	1	0.43429	0.417701
GOTERM_BP_DIRECT	GO:0043406~positive regulation of MAP kinase activity	3	2.38095	0.0391491	PDGFRB, CD40, PDGFA	125	49	19416	9.50988	1	0.43429	0.417701
GOTERM_BP_DIRECT	GO:0043536~positive regulation of blood vessel endothelial cell migration	3	2.38095	0.0406135	CD40, HSPB1, VEGFA	125	50	19416	9.31968	1	0.439364	0.422582
GOTERM_BP_DIRECT	GO:0035790~platelet-derived growth factor receptor-alpha signaling pathway	3	2.38095	0.0406135	PDGFRB, NTRK2, PDGFA	125	50	19416	9.31968	1	0.439364	0.422582
GOTERM_BP_DIRECT	GO:0006469~negative regulation of protein kinase activity	3	2.38095	0.0406135	HSPB1, PARK7, THY1	125	50	19416	9.31968	1	0.439364	0.422582
GOTERM_BP_DIRECT	GO:0031334~positive regulation of protein-containing complex assembly	3	2.38095	0.0436033	IFNG, PARK7, VEGFA	125	52	19416	8.96123	1	0.463054	0.445367
GOTERM_BP_DIRECT	GO:0050766~positive regulation of phagocytosis	3	2.38095	0.0436033	IFNG, GAS6, SOD1	125	52	19416	8.96123	1	0.463054	0.445367
GOTERM_BP_DIRECT	GO:2000329~negative regulation of T-helper 17 cell lineage commitment	2	1.5873	0.0438646	LGALS1, CD69	125	7	19416	44.3794	1	0.463054	0.445367
GOTERM_BP_DIRECT	GO:0048661~positive regulation of smooth muscle cell proliferation	3	2.38095	0.0466725	PDGFRB, NOTCH3, CCL5	125	54	19416	8.62933	1	0.488755	0.470086
GOTERM_BP_DIRECT	GO:0045600~positive regulation of fat cell differentiation	3	2.38095	0.0498187	SFRP1, CEBPB, RARRES2	125	56	19416	8.32114	1	0.507092	0.487722
GOTERM_BP_DIRECT	GO:0045590~negative regulation of regulatory T cell differentiation	2	1.5873	0.0499731	LAG3, MDK	125	8	19416	38.832	1	0.507092	0.487722
GOTERM_BP_DIRECT	GO:0010466~negative regulation of peptidase activity	2	1.5873	0.0499731	CSTB, CST7	125	8	19416	38.832	1	0.507092	0.487722
GOTERM_BP_DIRECT	GO:2000270~negative regulation of fibroblast apoptotic process	2	1.5873	0.0499731	SFRP1, GAS6	125	8	19416	38.832	1	0.507092	0.487722
GOTERM_BP_DIRECT	GO:0007157~heterophilic cell-cell adhesion via plasma membrane cell adhesion molecules	3	2.38095	0.0514198	VCAM1, CD6, CRTAM	125	57	19416	8.17516	1	0.513806	0.49418
GOTERM_BP_DIRECT	GO:0071363~cellular response to growth factor stimulus	3	2.38095	0.0514198	SFRP1, ANGPT2, GAS6	125	57	19416	8.17516	1	0.513806	0.49418
GOTERM_BP_DIRECT	GO:0001501~skeletal system development	4	3.1746	0.0526333	COL1A1, COMP, COL18A1, VCAN	125	132	19416	4.70691	1	0.518122	0.498332
GOTERM_BP_DIRECT	GO:0038063~collagen-activated tyrosine kinase receptor signaling pathway	3	2.38095	0.0530393	PDGFRB, COL1A1, NTRK2	125	58	19416	8.03421	1	0.518122	0.498332
GOTERM_BP_DIRECT	GO:0090398~cellular senescence	3	2.38095	0.0530393	COMP, NPM1, MIF	125	58	19416	8.03421	1	0.518122	0.498332
GOTERM_BP_DIRECT	GO:0061844~antimicrobial humoral immune response mediated by antimicrobial peptide	4	3.1746	0.0555768	CCL7, CCL5, NPY, CXCL13	125	135	19416	4.60231	1	0.520285	0.500412
GOTERM_BP_DIRECT	GO:1904894~positive regulation of receptor signaling pathway via STAT	2	1.5873	0.056043	CCL5, IL7R	125	9	19416	34.5173	1	0.520285	0.500412
GOTERM_BP_DIRECT	GO:0090037~positive regulation of protein kinase C signaling	2	1.5873	0.056043	CD40, VEGFA	125	9	19416	34.5173	1	0.520285	0.500412
GOTERM_BP_DIRECT	GO:0032287~peripheral nervous system myelin maintenance	2	1.5873	0.056043	NDRG1, SOD1	125	9	19416	34.5173	1	0.520285	0.500412
GOTERM_BP_DIRECT	GO:0008037~cell recognition	2	1.5873	0.056043	VCAN, CRTAM	125	9	19416	34.5173	1	0.520285	0.500412
GOTERM_BP_DIRECT	GO:0061042~vascular wound healing	2	1.5873	0.056043	MCAM, VEGFA	125	9	19416	34.5173	1	0.520285	0.500412
GOTERM_BP_DIRECT	GO:0002232~leukocyte chemotaxis involved in inflammatory response	2	1.5873	0.056043	MDK, PTN	125	9	19416	34.5173	1	0.520285	0.500412
GOTERM_BP_DIRECT	GO:0043065~positive regulation of apoptotic process	6	4.7619	0.0587858	SFRP1, LGALS1, GZMA, IGFBP3, F2R, SOD1	125	327	19416	2.85006	1	0.541906	0.521206
GOTERM_BP_DIRECT	GO:0038084~vascular endothelial growth factor signaling pathway	3	2.38095	0.0596945	NTRK2, PGF, VEGFA	125	62	19416	7.51587	1	0.545337	0.524507
GOTERM_BP_DIRECT	GO:0045785~positive regulation of cell adhesion	3	2.38095	0.0614012	MDK, CCL5, VEGFA	125	63	19416	7.39657	1	0.545337	0.524507
GOTERM_BP_DIRECT	GO:0033033~negative regulation of myeloid cell apoptotic process	2	1.5873	0.0620743	MIF, GAS6	125	10	19416	31.0656	1	0.545337	0.524507
GOTERM_BP_DIRECT	GO:0140507~granzyme-mediated programmed cell death signaling pathway	2	1.5873	0.0620743	GZMA, GZMB	125	10	19416	31.0656	1	0.545337	0.524507
GOTERM_BP_DIRECT	GO:0001961~positive regulation of cytokine-mediated signaling pathway	2	1.5873	0.0620743	CD74, GAS6	125	10	19416	31.0656	1	0.545337	0.524507
GOTERM_BP_DIRECT	GO:0002544~chronic inflammatory response	2	1.5873	0.0620743	VCAM1, CXCL13	125	10	19416	31.0656	1	0.545337	0.524507
GOTERM_BP_DIRECT	GO:1900748~positive regulation of vascular endothelial growth factor signaling pathway	2	1.5873	0.0620743	SMOC2, VEGFA	125	10	19416	31.0656	1	0.545337	0.524507
GOTERM_BP_DIRECT	GO:0071456~cellular response to hypoxia	4	3.1746	0.0627435	SFRP1, STC1, NDRG1, VEGFA	125	142	19416	4.37544	1	0.547218	0.526316
GOTERM_BP_DIRECT	GO:0071230~cellular response to amino acid stimulus	3	2.38095	0.0631245	COL1A1, NTRK2, CEBPB	125	64	19416	7.281	1	0.547218	0.526316
GOTERM_BP_DIRECT	GO:0051216~cartilage development	3	2.38095	0.0648641	SMAD1, CHI3L1, TIMP1	125	65	19416	7.16898	1	0.558599	0.537263
GOTERM_BP_DIRECT	GO:0031666~positive regulation of lipopolysaccharide-mediated signaling pathway	2	1.5873	0.0680675	LY96, MIF	125	11	19416	28.2415	1	0.581325	0.55912
GOTERM_BP_DIRECT	GO:0051604~protein maturation	3	2.38095	0.0683912	GZMA, GZMB, GZMH	125	67	19416	6.95499	1	0.581325	0.55912
GOTERM_BP_DIRECT	GO:0009611~response to wounding	3	2.38095	0.0701781	MDK, F2R, PDGFA	125	68	19416	6.85271	1	0.592665	0.570027
GOTERM_BP_DIRECT	GO:0071560~cellular response to transforming growth factor beta stimulus	3	2.38095	0.0719803	ACTA2, COL1A1, SFRP1	125	69	19416	6.75339	1	0.598121	0.575274
GOTERM_BP_DIRECT	GO:0070098~chemokine-mediated signaling pathway	3	2.38095	0.0737974	CCL7, CCL5, CXCL13	125	70	19416	6.65691	1	0.598121	0.575274
GOTERM_BP_DIRECT	GO:0050679~positive regulation of epithelial cell proliferation	3	2.38095	0.0737974	SFRP1, CCL5, VEGFA	125	70	19416	6.65691	1	0.598121	0.575274
GOTERM_BP_DIRECT	GO:2000343~positive regulation of chemokine (C-X-C motif) ligand 2 production	2	1.5873	0.0740226	CD74, MIF	125	12	19416	25.888	1	0.598121	0.575274
GOTERM_BP_DIRECT	GO:0032964~collagen biosynthetic process	2	1.5873	0.0740226	COL1A1, PCOLCE	125	12	19416	25.888	1	0.598121	0.575274
GOTERM_BP_DIRECT	GO:0019732~antifungal humoral response	2	1.5873	0.0740226	NPY, RARRES2	125	12	19416	25.888	1	0.598121	0.575274
GOTERM_BP_DIRECT	GO:2000347~positive regulation of hepatocyte proliferation	2	1.5873	0.0740226	MDK, PTN	125	12	19416	25.888	1	0.598121	0.575274
GOTERM_BP_DIRECT	GO:0006909~phagocytosis	3	2.38095	0.0756293	ICAM3, GAS6, CORO1A	125	71	19416	6.56315	1	0.607354	0.584155
GOTERM_BP_DIRECT	GO:0043030~regulation of macrophage activation	2	1.5873	0.07994	CD74, MIF	125	13	19416	23.8966	1	0.638058	0.613686
GOTERM_BP_DIRECT	GO:0009410~response to xenobiotic stimulus	5	3.96825	0.0826907	COL1A1, COL18A1, SFRP1, IGFBP2, SOD1	125	257	19416	3.02195	1	0.656013	0.630955
GOTERM_BP_DIRECT	GO:0010820~positive regulation of T cell chemotaxis	2	1.5873	0.0858199	CCL5, CXCL13	125	14	19416	22.1897	1	0.676736	0.650887
GOTERM_BP_DIRECT	GO:0019731~antibacterial humoral response	3	2.38095	0.086915	NPY, WFDC2, HLA-E	125	77	19416	6.05174	1	0.677888	0.651995
GOTERM_BP_DIRECT	GO:0071346~cellular response to type II interferon	3	2.38095	0.0888427	CCL5, VIM, GBP2	125	78	19416	5.97415	1	0.677888	0.651995
GOTERM_BP_DIRECT	GO:0045669~positive regulation of osteoblast differentiation	3	2.38095	0.0888427	SMAD1, CEBPB, VEGFA	125	78	19416	5.97415	1	0.677888	0.651995
GOTERM_BP_DIRECT	GO:0008217~regulation of blood pressure	3	2.38095	0.0888427	ACTA2, NPY, SOD1	125	78	19416	5.97415	1	0.677888	0.651995
GOTERM_BP_DIRECT	GO:0042742~defense response to bacterium	4	3.1746	0.0890767	CEBPB, PLA2G2A, CXCL13, GBP2	125	165	19416	3.76553	1	0.677888	0.651995
GOTERM_BP_DIRECT	GO:0043518~negative regulation of DNA damage response, signal transduction by p53 class mediator	2	1.5873	0.0916625	CD74, MIF	125	15	19416	20.7104	1	0.677888	0.651995
GOTERM_BP_DIRECT	GO:0002690~positive regulation of leukocyte chemotaxis	2	1.5873	0.0916625	MDK, PTN	125	15	19416	20.7104	1	0.677888	0.651995
GOTERM_BP_DIRECT	GO:0046598~positive regulation of viral entry into host cell	2	1.5873	0.0916625	CD74, LGALS1	125	15	19416	20.7104	1	0.677888	0.651995
GOTERM_BP_DIRECT	GO:1902166~negative regulation of intrinsic apoptotic signaling pathway in response to DNA damage by p53 class mediator	2	1.5873	0.0916625	CD74, MIF	125	15	19416	20.7104	1	0.677888	0.651995
GOTERM_BP_DIRECT	GO:0050930~induction of positive chemotaxis	2	1.5873	0.0916625	PGF, VEGFA	125	15	19416	20.7104	1	0.677888	0.651995
GOTERM_BP_DIRECT	GO:0001886~endothelial cell morphogenesis	2	1.5873	0.0916625	COL18A1, STC1	125	15	19416	20.7104	1	0.677888	0.651995
GOTERM_BP_DIRECT	GO:0021987~cerebral cortex development	3	2.38095	0.092736	NTRK2, MDK, NPY	125	80	19416	5.8248	1	0.681975	0.655925
GOTERM_BP_DIRECT	GO:0010467~gene expression	4	3.1746	0.0953295	ANGPT2, IL7R, LAT, SOD1	125	170	19416	3.65478	1	0.69713	0.670502
GOTERM_BP_DIRECT	GO:0051770~positive regulation of nitric-oxide synthase biosynthetic process	2	1.5873	0.0974681	FCER2, IFNG	125	16	19416	19.416	1	0.708809	0.681735
