# Supplementary material for: Single-cell tumor microenvironment profiling informs a circulating proteome test for the interception of malignant transformation in NF1 nerve sheath tumors
Source: Research Square preprint supplement (doi:10.21203/rs.3.rs-6865989/v1), 2025-06-18
Supplement: Supplementary file 2 [file 3dca5ca44a93725173718406.xlsx]

## Sheet: NF1_mnn_integrate_with_leaky_sc
Supplementary Table 2. Top50 most highly expressed marker genes in each cell type shown in the single-cell atlas
p_val	avg_log2FC	pct.1	pct.2	p_val_adj	cluster	gene
0	3.74195	0.517	0.05	0	Fibroblast 1	CST1
0	3.49797	0.999	0.185	0	Fibroblast 1	APOD
0	3.14508	0.929	0.14	0	Fibroblast 1	MEST
0	3.09296	0.812	0.158	0	Fibroblast 1	LHFP
0	3.01128	0.707	0.083	0	Fibroblast 1	ANGPTL7
0	2.92101	0.999	0.164	0	Fibroblast 1	LUM
0	2.86582	0.943	0.105	0	Fibroblast 1	CYP1B1
0	2.79503	0.982	0.302	0	Fibroblast 1	IGFBP4
0	2.72766	0.999	0.169	0	Fibroblast 1	DCN
0	2.5874	0.84	0.181	0	Fibroblast 1	CYR61
0	2.54066	0.928	0.181	0	Fibroblast 1	OLFML3
0	2.50331	0.861	0.092	0	Fibroblast 1	PTGDS
0	2.44041	0.977	0.194	0	Fibroblast 1	SERPINF1
0	2.43131	0.804	0.186	0	Fibroblast 1	CTGF
0	2.40778	0.997	0.446	0	Fibroblast 1	GSN
0	2.40378	0.994	0.218	0	Fibroblast 1	COL1A1
0	2.37954	0.985	0.219	0	Fibroblast 1	COL3A1
0	2.3509	0.883	0.118	0	Fibroblast 1	OLFML2B
0	2.27051	0.891	0.156	0	Fibroblast 1	THBS1
0	2.26793	0.893	0.09	0	Fibroblast 1	SFRP4
0	2.24428	0.906	0.126	0	Fibroblast 1	GPC3
0	2.22976	0.997	0.305	0	Fibroblast 1	COL1A2
0	2.22276	0.854	0.15	0	Fibroblast 1	TMEM98
0	2.21509	0.998	0.314	0	Fibroblast 1	IGFBP7
0	2.18289	0.815	0.174	0	Fibroblast 1	C11orf96
0	2.16478	0.856	0.116	0	Fibroblast 1	THBS4
0	2.14573	0.938	0.212	0	Fibroblast 1	IGFBP6
0	2.12071	0.919	0.147	0	Fibroblast 1	C1S
0	2.11854	0.749	0.066	0	Fibroblast 1	BAMBI
0	2.09291	0.891	0.241	0	Fibroblast 1	CCL2
0	2.08247	0.698	0.072	0	Fibroblast 1	FOXS1
0	2.06535	0.825	0.164	0	Fibroblast 1	MIA
0	2.04487	0.848	0.172	0	Fibroblast 1	C1R
0	2.04357	0.862	0.169	0	Fibroblast 1	CTHRC1
0	2.03108	0.88	0.105	0	Fibroblast 1	OGN
0	2.02797	0.77	0.191	0	Fibroblast 1	RGS16
0	2.01632	0.936	0.252	0	Fibroblast 1	IFI27
0	2.01465	0.541	0.043	0	Fibroblast 1	TAC1
0	1.9937	0.938	0.173	0	Fibroblast 1	PCOLCE
0	1.97649	0.948	0.278	0	Fibroblast 1	TGFBI
0	1.97584	0.778	0.096	0	Fibroblast 1	FHL2
0	1.96548	0.858	0.085	0	Fibroblast 1	PTCH1
0	1.96371	0.746	0.198	0	Fibroblast 1	IGFBP5
0	1.92994	0.794	0.196	0	Fibroblast 1	PTRF
0	1.91889	0.808	0.068	0	Fibroblast 1	PAMR1
0	1.90211	0.725	0.117	0	Fibroblast 1	PPAP2B
0	1.89743	0.864	0.176	0	Fibroblast 1	OAF
0	1.87628	0.81	0.224	0	Fibroblast 1	SRM
0	1.8408	0.993	0.408	0	Fibroblast 1	TIMP1
0	1.83361	0.822	0.092	0	Fibroblast 1	SRPX2
0	3.6353	0.926	0.167	0	Macrophage 1	CCL3
0	3.1851	0.851	0.219	0	Macrophage 1	CCL4
0	3.0536	0.778	0.111	0	Macrophage 1	CCL3L1
0	3.03104	0.65	0.096	0	Macrophage 1	CCL4L2
0	2.94408	0.514	0.117	0	Macrophage 1	IL8
0	2.8095	0.464	0.063	0	Macrophage 1	CH25H
0	2.76786	0.356	0.046	0	Macrophage 1	CCL3L3
0	2.67382	0.733	0.211	0	Macrophage 1	EGR2
0	2.64211	0.91	0.283	0	Macrophage 1	SGK1
0	2.56303	0.898	0.21	0	Macrophage 1	CD83
0	2.46628	0.944	0.574	0	Macrophage 1	DUSP1
0	2.45693	0.955	0.28	0	Macrophage 1	APOE
0	2.42109	0.911	0.163	0	Macrophage 1	C1QC
0	2.41616	0.889	0.203	0	Macrophage 1	CD14
0	2.27244	0.992	0.414	0	Macrophage 1	CD74
0	2.22241	0.924	0.172	0	Macrophage 1	C1QB
0	2.20407	0.912	0.361	0	Macrophage 1	IER3
0	2.18462	0.866	0.242	0	Macrophage 1	HLA-DRB5
0	2.15817	0.932	0.184	0	Macrophage 1	C1QA
0	2.14286	0.745	0.219	0	Macrophage 1	RGS1
0	2.13911	0.451	0.167	0	Macrophage 1	TMEM107
0	2.12963	0.48	0.27	0	Macrophage 1	HSPA1A
0	2.11515	0.597	0.142	0	Macrophage 1	IFI30
0	2.11239	0.72	0.227	0	Macrophage 1	MAFB
0	2.10179	0.924	0.592	0	Macrophage 1	KLF6
0	2.06278	0.973	0.336	0	Macrophage 1	HLA-DRA
0	2.06238	0.97	0.685	0	Macrophage 1	FOS
0	2.0378	0.757	0.157	0	Macrophage 1	APOC1
0	2.01521	0.927	0.634	0	Macrophage 1	IER2
0	1.97515	0.958	0.317	0	Macrophage 1	HLA-DPA1
0	1.96113	0.795	0.166	0	Macrophage 1	MS4A7
0	1.94927	0.505	0.139	0	Macrophage 1	LINC00936
0	1.94603	0.52	0.295	0	Macrophage 1	CCL2
0	1.94006	0.744	0.373	0	Macrophage 1	KLF4
0	1.93322	0.891	0.524	0	Macrophage 1	EGR1
0	1.8868	0.627	0.098	0	Macrophage 1	GPR34
0	1.87526	0.63	0.111	0	Macrophage 1	TREM2
0	1.86037	0.709	0.14	0	Macrophage 1	CLEC7A
0	1.85728	0.543	0.116	0	Macrophage 1	TNF
0	1.85119	0.97	0.498	0	Macrophage 1	SAT1
0	1.84988	0.97	0.355	0	Macrophage 1	HLA-DRB1
0	1.84742	0.514	0.297	0	Macrophage 1	EIF4E
0	1.84468	0.535	0.149	0	Macrophage 1	OTUD1
0	1.84187	0.736	0.152	0	Macrophage 1	CSF1R
0	1.82994	0.862	0.316	0	Macrophage 1	RNASET2
0	1.82716	0.508	0.172	0	Macrophage 1	TCOF1
0	1.8081	0.561	0.153	0	Macrophage 1	NFKBID
0	1.79925	0.708	0.163	0	Macrophage 1	IL1B
0	1.79913	0.691	0.33	0	Macrophage 1	GPX1
0	1.73634	0.727	0.184	0	Macrophage 1	HLA-DMB
0	3.31364	0.895	0.111	0	Cytotoxic T cell 1	IL32
0	3.09653	0.827	0.102	0	Cytotoxic T cell 1	CCL5
0	3.0906	0.419	0.03	0	Cytotoxic T cell 1	KLRB1
0	3.02414	0.801	0.093	0	Cytotoxic T cell 1	CD52
0	2.86733	0.881	0.249	0	Cytotoxic T cell 1	CXCR4
0	2.70244	0.765	0.047	0	Cytotoxic T cell 1	CD3D
0	2.56712	0.703	0.053	0	Cytotoxic T cell 1	CD2
0	2.51047	0.479	0.04	0	Cytotoxic T cell 1	LTB
0	2.45294	0.335	0.019	0	Cytotoxic T cell 1	IL7R
0	2.36848	0.678	0.061	0	Cytotoxic T cell 1	GZMA
0	2.3354	0.708	0.222	0	Cytotoxic T cell 1	TNFAIP3
0	2.33006	0.614	0.039	0	Cytotoxic T cell 1	CD3E
0	2.2813	0.633	0.151	0	Cytotoxic T cell 1	CD69
0	2.25499	0.603	0.06	0	Cytotoxic T cell 1	CST7
0	2.21008	0.518	0.048	0	Cytotoxic T cell 1	GZMK
0	2.16401	0.494	0.067	0	Cytotoxic T cell 1	RUNX3
0	2.10162	0.525	0.048	0	Cytotoxic T cell 1	PTPRCAP
0	2.085	0.508	0.032	0	Cytotoxic T cell 1	CD3G
0	2.00305	0.838	0.281	0	Cytotoxic T cell 1	PTPRC
0	1.97856	0.612	0.3	0	Cytotoxic T cell 1	CREM
0	1.97122	0.901	0.664	0	Cytotoxic T cell 1	ZFP36L2
0	1.96597	0.785	0.251	0	Cytotoxic T cell 1	HCST
0	1.96476	0.771	0.265	0	Cytotoxic T cell 1	DUSP2
0	1.9511	0.58	0.246	0	Cytotoxic T cell 1	LEPROTL1
0	1.92268	0.951	0.717	0	Cytotoxic T cell 1	BTG1
0	1.89589	0.384	0.03	0	Cytotoxic T cell 1	BCL11B
0	1.88864	0.652	0.291	0	Cytotoxic T cell 1	RGCC
0	1.81188	0.544	0.12	0	Cytotoxic T cell 1	CD48
0	1.8087	0.349	0.034	0	Cytotoxic T cell 1	CD8A
0	1.78915	0.397	0.067	0	Cytotoxic T cell 1	CD7
0	1.78837	0.751	0.306	0	Cytotoxic T cell 1	ARHGDIB
0	1.77261	0.472	0.056	0	Cytotoxic T cell 1	IL2RG
0	1.76692	0.425	0.035	0	Cytotoxic T cell 1	GZMM
0	1.76363	0.366	0.057	0	Cytotoxic T cell 1	TUBA4A
0	1.71054	0.4	0.06	0	Cytotoxic T cell 1	SPOCK2
0	1.70988	0.448	0.073	0	Cytotoxic T cell 1	ACAP1
0	1.69024	0.999	0.885	0	Cytotoxic T cell 1	B2M
0	1.68558	0.682	0.411	0	Cytotoxic T cell 1	TSC22D3
0	1.66773	0.491	0.154	0	Cytotoxic T cell 1	ETS1
0	1.65569	0.597	0.346	0	Cytotoxic T cell 1	YPEL5
0	1.64243	0.536	0.181	0	Cytotoxic T cell 1	ARL4C
0	1.62524	0.51	0.234	0	Cytotoxic T cell 1	PPP2R5C
0	1.62076	0.429	0.181	0	Cytotoxic T cell 1	CNOT6L
0	1.61553	0.385	0.032	0	Cytotoxic T cell 1	LCK
0	1.59366	0.469	0.1	0	Cytotoxic T cell 1	RAC2
0	1.57931	0.541	0.159	0	Cytotoxic T cell 1	LCP1
0	1.57649	0.643	0.225	0	Cytotoxic T cell 1	CORO1A
0	1.57303	0.333	0.04	0	Cytotoxic T cell 1	RHOH
0	1.57236	0.504	0.185	0	Cytotoxic T cell 1	STK17B
0	1.5713	0.567	0.278	0	Cytotoxic T cell 1	ZNF331
0	3.95882	0.853	0.014	0	Endothelial cell 1	VWF
0	3.80047	0.339	0.04	0	Endothelial cell 1	IGFBP3
0	3.65977	0.657	0.073	0	Endothelial cell 1	ENPP2
0	3.31666	0.693	0.015	0	Endothelial cell 1	CLDN5
0	3.23152	0.7	0.099	0	Endothelial cell 1	INSR
0	3.21243	0.756	0.114	0	Endothelial cell 1	AQP1
0	3.01064	0.946	0.285	0	Endothelial cell 1	SPARCL1
0	2.81371	0.364	0.003	0	Endothelial cell 1	CCL14
0	2.757	0.722	0.041	0	Endothelial cell 1	CLEC14A
0	2.71362	0.651	0.023	0	Endothelial cell 1	FLT1
0	2.66454	0.43	0.032	0	Endothelial cell 1	STC1
0	2.61759	0.613	0.009	0	Endothelial cell 1	PLVAP
0	2.61342	0.764	0.106	0	Endothelial cell 1	EPAS1
0	2.47698	0.576	0.033	0	Endothelial cell 1	ABCG2
0	2.46265	0.689	0.044	0	Endothelial cell 1	EMCN
0	2.41165	0.77	0.212	0	Endothelial cell 1	GNG11
0	2.40008	0.637	0.01	0	Endothelial cell 1	PTPRB
0	2.38037	0.73	0.203	0	Endothelial cell 1	TM4SF1
0	2.37087	0.684	0.066	0	Endothelial cell 1	CD93
0	2.36943	0.667	0.125	0	Endothelial cell 1	RAMP2
0	2.35752	0.685	0.044	0	Endothelial cell 1	PALMD
0	2.35721	0.65	0.06	0	Endothelial cell 1	EGFL7
0	2.34331	0.665	0.22	0	Endothelial cell 1	SPRY1
0	2.32644	0.636	0.112	0	Endothelial cell 1	LIFR
0	2.27356	0.715	0.138	0	Endothelial cell 1	ARHGAP29
0	2.24984	0.755	0.245	0	Endothelial cell 1	ENG
0	2.23369	0.745	0.201	0	Endothelial cell 1	NPDC1
0	2.21871	0.563	0.012	0	Endothelial cell 1	PODXL
0	2.21801	0.453	0.02	0	Endothelial cell 1	ELTD1
0	2.19281	0.548	0.028	0	Endothelial cell 1	NOTCH4
0	2.18229	0.707	0.188	0	Endothelial cell 1	HSPG2
0	2.16338	0.897	0.497	0	Endothelial cell 1	A2M
0	2.16191	0.603	0.009	0	Endothelial cell 1	MMRN2
0	2.10269	0.567	0.038	0	Endothelial cell 1	THSD7A
0	2.09008	0.58	0.008	0	Endothelial cell 1	CDH5
0	2.07316	0.522	0.009	0	Endothelial cell 1	SOX18
0	2.05413	0.592	0.01	0	Endothelial cell 1	ECSCR
0	2.04666	0.792	0.388	0	Endothelial cell 1	TXNIP
0	2.04266	0.58	0.006	0	Endothelial cell 1	CYYR1
0	2.03724	0.666	0.158	0	Endothelial cell 1	CAV1
0	2.03424	0.596	0.021	0	Endothelial cell 1	ESAM
0	2.03406	0.541	0.058	0	Endothelial cell 1	GJA1
0	1.99443	0.51	0.009	0	Endothelial cell 1	KDR
0	1.97499	0.625	0.136	0	Endothelial cell 1	PDLIM1
0	1.9662	0.688	0.183	0	Endothelial cell 1	NFIB
0	1.96208	0.476	0.01	0	Endothelial cell 1	RAMP3
0	1.94994	0.513	0.151	0	Endothelial cell 1	ADAMTS1
0	1.94344	0.515	0.109	0	Endothelial cell 1	SLC9A3R2
0	1.93485	0.587	0.052	0	Endothelial cell 1	LDB2
0	1.93233	0.711	0.281	0	Endothelial cell 1	STOM
0	4.71105	0.982	0.105	0	Schwann cell 1	S100B
0	3.93685	0.902	0.136	0	Schwann cell 1	SERPINE2
0	3.81449	0.959	0.11	0	Schwann cell 1	GPM6B
0	3.71719	0.89	0.121	0	Schwann cell 1	CRYAB
0	3.48484	0.896	0.071	0	Schwann cell 1	ITGB8
0	3.10255	0.885	0.081	0	Schwann cell 1	LGI4
0	2.99505	0.997	0.582	0	Schwann cell 1	S100A6
0	2.98522	0.732	0.033	0	Schwann cell 1	CAPS
0	2.92215	0.749	0.044	0	Schwann cell 1	GAP43
0	2.79283	0.929	0.228	0	Schwann cell 1	CDH19
0	2.79108	0.814	0.084	0	Schwann cell 1	PLP1
0	2.76203	0.855	0.158	0	Schwann cell 1	PMEPA1
0	2.74268	0.704	0.087	0	Schwann cell 1	ITIH5
0	2.73683	0.833	0.058	0	Schwann cell 1	NRXN1
0	2.66734	0.637	0.059	0	Schwann cell 1	MPZ
0	2.60677	0.81	0.194	0	Schwann cell 1	PDLIM4
0	2.57706	0.788	0.112	0	Schwann cell 1	DAG1
0	2.57599	0.664	0.023	0	Schwann cell 1	FXYD3
0	2.50196	0.941	0.346	0	Schwann cell 1	LGALS3
0	2.49608	0.644	0.075	0	Schwann cell 1	LPL
0	2.39794	0.824	0.176	0	Schwann cell 1	METRN
0	2.32056	0.96	0.357	0	Schwann cell 1	S100A10
0	2.30059	0.955	0.587	0	Schwann cell 1	ANXA1
0	2.28697	0.904	0.249	0	Schwann cell 1	CD9
0	2.27047	0.553	0.019	0	Schwann cell 1	PMP2
0	2.23285	0.719	0.118	0	Schwann cell 1	VWA1
0	2.211	0.321	0.025	0	Schwann cell 1	SEMA3B
0	2.20364	0.746	0.12	0	Schwann cell 1	PTN
0	2.19278	0.837	0.184	0	Schwann cell 1	FXYD1
0	2.18134	0.709	0.068	0	Schwann cell 1	CHL1
0	2.15908	0.873	0.314	0	Schwann cell 1	PMP22
0	2.14633	0.715	0.083	0	Schwann cell 1	SCD
0	2.14252	0.624	0.03	0	Schwann cell 1	IL34
0	2.13939	0.948	0.394	0	Schwann cell 1	SPARC
0	2.13144	0.751	0.218	0	Schwann cell 1	RARRES2
0	2.11856	0.788	0.202	0	Schwann cell 1	MIA
0	2.11449	0.752	0.169	0	Schwann cell 1	CSRP1
0	2.10066	0.539	0.153	0	Schwann cell 1	ALDH1A1
0	2.08297	0.674	0.258	0	Schwann cell 1	IGFBP2
0	2.04407	0.997	0.694	0	Schwann cell 1	VIM
0	2.03781	0.736	0.136	0	Schwann cell 1	PLAT
0	2.01791	0.695	0.044	0	Schwann cell 1	PTPRZ1
0	2.01485	0.756	0.161	0	Schwann cell 1	ALDH1A3
0	1.98593	0.744	0.111	0	Schwann cell 1	PDGFA
0	1.96828	0.706	0.158	0	Schwann cell 1	PROS1
0	1.95052	0.829	0.277	0	Schwann cell 1	AP1S2
0	1.94173	0.661	0.144	0	Schwann cell 1	CTNNAL1
0	1.93211	0.715	0.173	0	Schwann cell 1	THBS2
0	1.93013	0.765	0.164	0	Schwann cell 1	CADM1
0	1.92552	0.649	0.089	0	Schwann cell 1	NTM
0	3.5859	0.585	0.065	0	Cytotoxic T cell 2	GZMK
0	3.21798	0.765	0.135	0	Cytotoxic T cell 2	CCL5
0	2.92944	0.556	0.08	0	Cytotoxic T cell 2	NKG7
0	2.88936	0.635	0.089	0	Cytotoxic T cell 2	GZMA
0	2.79626	0.658	0.082	0	Cytotoxic T cell 2	CD2
0	2.55516	0.598	0.085	0	Cytotoxic T cell 2	CD3D
0	2.46557	0.676	0.154	0	Cytotoxic T cell 2	IL32
0	2.32236	0.474	0.071	0	Cytotoxic T cell 2	PTPRCAP
0	2.25581	0.418	0.044	0	Cytotoxic T cell 2	CD8A
0	2.21657	0.35	0.043	0	Cytotoxic T cell 2	GZMH
0	2.19559	0.496	0.088	0	Cytotoxic T cell 2	CST7
0	2.09667	0.789	0.307	0	Cytotoxic T cell 2	PTPRC
0	2.00507	0.33	0.034	0	Cytotoxic T cell 2	CD27
0	1.99064	0.429	0.076	0	Cytotoxic T cell 2	IL2RG
0	1.97661	0.467	0.069	0	Cytotoxic T cell 2	CD3E
0	1.96992	0.562	0.134	0	Cytotoxic T cell 2	CD52
0	1.94059	0.426	0.089	0	Cytotoxic T cell 2	ACAP1
0	1.92903	0.388	0.054	0	Cytotoxic T cell 2	CTSW
0	1.91341	0.867	0.786	0	Cytotoxic T cell 2	HLA-A
0	1.8526	0.389	0.057	0	Cytotoxic T cell 2	CD3G
0	1.83313	0.497	0.177	0	Cytotoxic T cell 2	CD69
0	1.75053	0.26	0.173	0	Cytotoxic T cell 2	CMC1
0	1.71403	0.546	0.246	0	Cytotoxic T cell 2	CORO1A
0	1.68544	0.611	0.281	0	Cytotoxic T cell 2	HCST
0	1.68262	0.324	0.159	0	Cytotoxic T cell 2	KIAA1551
0	1.64015	0.367	0.106	0	Cytotoxic T cell 2	GIMAP7
0	1.62269	0.331	0.049	0	Cytotoxic T cell 2	LCK
0	1.61616	0.949	0.892	0	Cytotoxic T cell 2	B2M
0	1.61481	0.826	0.697	0	Cytotoxic T cell 2	HLA-C
0	1.5835	0.296	0.067	0	Cytotoxic T cell 2	LTB
0	1.57232	0.314	0.117	0	Cytotoxic T cell 2	APOBEC3G
0	1.55864	0.588	0.289	0	Cytotoxic T cell 2	CXCR4
0	1.54158	0.467	0.287	0	Cytotoxic T cell 2	EVL
0	1.53245	0.264	0.032	0	Cytotoxic T cell 2	CD8B
0	1.49208	0.36	0.197	0	Cytotoxic T cell 2	ITM2A
0	1.48689	0.261	0.041	0	Cytotoxic T cell 2	CD96
0	1.47861	0.267	0.063	0	Cytotoxic T cell 2	TRAF3IP3
0	1.474	0.885	0.704	0	Cytotoxic T cell 2	HLA-B
0	1.46893	0.374	0.12	0	Cytotoxic T cell 2	RAC2
0	1.46887	0.377	0.185	0	Cytotoxic T cell 2	HLA-F
0	1.45667	0.442	0.336	0	Cytotoxic T cell 2	RNF213
0	1.42413	0.349	0.175	0	Cytotoxic T cell 2	ETS1
0	1.41834	0.266	0.051	0	Cytotoxic T cell 2	LAT
0	1.41512	0.374	0.252	0	Cytotoxic T cell 2	PPP2R5C
0	1.41106	0.253	0.037	0	Cytotoxic T cell 2	PRF1
0	1.39016	0.361	0.202	0	Cytotoxic T cell 2	RARRES3
0	1.3865	0.382	0.166	0	Cytotoxic T cell 2	FYB
0	1.38298	0.253	0.094	0	Cytotoxic T cell 2	ITGA4
0	1.38286	0.284	0.086	0	Cytotoxic T cell 2	CD7
0	1.37194	0.262	0.071	0	Cytotoxic T cell 2	PTPN7
0	3.33662	0.648	0.022	0	Dentritic cell	FCER1A
0	2.97228	0.968	0.219	0	Dentritic cell	HLA-DQA1
0	2.9334	0.999	0.345	0	Dentritic cell	HLA-DPB1
0	2.81408	0.973	0.273	0	Dentritic cell	HLA-DQB1
0	2.69084	0.999	0.349	0	Dentritic cell	HLA-DPA1
0	2.59584	1	0.368	0	Dentritic cell	HLA-DRA
0	2.46234	0.998	0.386	0	Dentritic cell	HLA-DRB1
0	2.2307	1	0.444	0	Dentritic cell	CD74
0	2.21687	0.852	0.275	0	Dentritic cell	HLA-DRB5
0	2.21457	0.52	0.087	0	Dentritic cell	HLA-DQA2
0	2.18214	0.83	0.239	0	Dentritic cell	PLAUR
0	2.16866	0.785	0.266	0	Dentritic cell	RGS2
0	2.10025	0.818	0.234	0	Dentritic cell	GPR183
0	2.03925	0.753	0.147	0	Dentritic cell	LYZ
0	2.00859	0.446	0.018	0	Dentritic cell	CLEC10A
0	1.91889	0.355	0.035	0	Dentritic cell	C15orf48
0	1.84831	0.615	0.122	0	Dentritic cell	PHACTR1
0	1.80986	0.265	0.036	0	Dentritic cell	AREG
0	1.72524	0.905	0.285	0	Dentritic cell	HLA-DMA
0	1.68112	0.767	0.172	0	Dentritic cell	LST1
0	1.65031	0.668	0.141	0	Dentritic cell	MNDA
0	1.62301	0.785	0.213	0	Dentritic cell	MS4A6A
0	1.62022	0.955	0.29	0	Dentritic cell	TYROBP
0	1.61963	0.685	0.146	0	Dentritic cell	C1orf162
0	1.61764	0.555	0.151	0	Dentritic cell	BCL2A1
0	1.60745	0.483	0.139	0	Dentritic cell	IL8
0	1.58408	0.805	0.479	0	Dentritic cell	HERPUD1
0	1.57293	0.773	0.245	0	Dentritic cell	RGS1
0	1.50904	0.275	0.124	0	Dentritic cell	CXCL2
0	1.50182	0.721	0.191	0	Dentritic cell	IL1B
0	1.49985	0.962	0.478	0	Dentritic cell	SRGN
0	1.44141	0.902	0.246	0	Dentritic cell	AIF1
0	1.43544	0.472	0.167	0	Dentritic cell	CPVL
0	1.42504	0.939	0.524	0	Dentritic cell	SAT1
0	1.41532	0.88	0.247	0	Dentritic cell	CD83
0	1.40181	0.426	0.059	0	Dentritic cell	FCGR2B
0	1.37524	0.75	0.212	0	Dentritic cell	HLA-DMB
0	1.36471	0.648	0.209	0	Dentritic cell	CTSH
0	1.33734	0.985	0.794	0	Dentritic cell	FTH1
0	1.33241	0.763	0.392	0	Dentritic cell	KLF4
0	1.28875	0.605	0.165	0	Dentritic cell	IFI30
0	1.28865	0.647	0.351	0	Dentritic cell	GPX1
0	1.25811	0.567	0.224	0	Dentritic cell	NR4A3
0	1.25228	0.575	0.222	0	Dentritic cell	RILPL2
0	1.24001	0.462	0.206	0	Dentritic cell	INSIG1
0	1.23742	0.592	0.309	0	Dentritic cell	RGCC
0	1.237	0.814	0.321	0	Dentritic cell	SGK1
0	1.22036	0.501	0.19	0	Dentritic cell	TCOF1
0	1.20258	0.481	0.118	0	Dentritic cell	RNASE6
0	1.20149	0.567	0.167	0	Dentritic cell	OLR1
0	3.34856	0.856	0.185	0	Macrophage 2	IL1B
0	2.84286	0.747	0.149	0	Macrophage 2	CCL3L1
0	2.74766	0.377	0.043	0	Macrophage 2	CXCL8
0	2.63808	0.589	0.128	0	Macrophage 2	CCL4L2
0	2.61792	0.832	0.174	0	Macrophage 2	PLEK
0	2.59239	0.848	0.154	0	Macrophage 2	OLR1
0	2.49929	0.91	0.235	0	Macrophage 2	PLAUR
0	2.3957	0.976	0.243	0	Macrophage 2	CD83
0	2.3779	0.368	0.106	0	Macrophage 2	SPP1
0	2.37118	0.586	0.201	0	Macrophage 2	PLIN2
0	2.32875	0.811	0.114	0	Macrophage 2	C5AR1
0	2.25093	0.937	0.389	0	Macrophage 2	IER3
0	2.23983	0.845	0.338	0	Macrophage 2	HIF1A
0	2.22836	0.801	0.296	0	Macrophage 2	EIF4E
0	2.17844	0.872	0.232	0	Macrophage 2	GPR183
0	2.15434	0.808	0.139	0	Macrophage 2	MSR1
0	2.11781	0.801	0.255	0	Macrophage 2	CCL4
0	2.10366	0.935	0.315	0	Macrophage 2	SGK1
0	2.08781	0.992	0.477	0	Macrophage 2	SRGN
0	2.06057	0.804	0.25	0	Macrophage 2	MAFB
0	2.03192	0.693	0.146	0	Macrophage 2	BCL2A1
0	2.02855	0.265	0.062	0	Macrophage 2	G0S2
0	2.0146	0.985	0.315	0	Macrophage 2	APOE
0	1.99004	0.994	0.387	0	Macrophage 2	HLA-DRB1
0	1.98345	0.996	0.369	0	Macrophage 2	HLA-DRA
0	1.95444	0.905	0.209	0	Macrophage 2	CCL3
0	1.942	0.735	0.218	0	Macrophage 2	DSE
0	1.9096	0.988	0.522	0	Macrophage 2	SAT1
0	1.89484	0.861	0.197	0	Macrophage 2	MS4A7
0	1.88592	0.678	0.126	0	Macrophage 2	B3GNT5
0	1.8839	0.709	0.218	0	Macrophage 2	NR4A3
0	1.85708	0.962	0.21	0	Macrophage 2	C1QB
0	1.85502	0.968	0.608	0	Macrophage 2	KLF6
0	1.85128	0.834	0.186	0	Macrophage 2	APOC1
0	1.84555	0.77	0.157	0	Macrophage 2	RASGEF1B
0	1.84543	0.651	0.21	0	Macrophage 2	NFKB1
0	1.81451	0.855	0.212	0	Macrophage 2	C3
0	1.77902	0.865	0.408	0	Macrophage 2	REL
0	1.77742	0.696	0.162	0	Macrophage 2	IFI30
0	1.75674	0.672	0.158	0	Macrophage 2	ZNF267
0	1.74515	0.626	0.2	0	Macrophage 2	BASP1
0	1.73831	0.83	0.373	0	Macrophage 2	ELF1
0	1.73091	0.616	0.166	0	Macrophage 2	OTUD1
0	1.72855	0.778	0.362	0	Macrophage 2	SOD2
0	1.72349	0.684	0.123	0	Macrophage 2	SCIN
0	1.71449	0.798	0.299	0	Macrophage 2	NAMPT
0	1.71213	0.315	0.027	0	Macrophage 2	IL1A
0	1.70413	0.661	0.146	0	Macrophage 2	IL18
0	1.69882	0.754	0.269	0	Macrophage 2	PTPRE
0	1.69506	0.837	0.226	0	Macrophage 2	HLA-DQA1
0	4.33627	0.749	0.036	0	Malignant cell 1	DLK1
0	3.07606	0.66	0.278	0	Malignant cell 1	NDRG1
0	2.91105	0.54	0.017	0	Malignant cell 1	SCXA
0	2.63965	0.99	0.749	0	Malignant cell 1	GAPDH
0	2.55271	0.319	0.003	0	Malignant cell 1	SPINK6
0	2.48102	0.635	0.216	0	Malignant cell 1	MGP
0	2.45284	0.594	0.022	0	Malignant cell 1	NPW
0	2.3472	0.375	0.082	0	Malignant cell 1	ANGPT2
0	2.17353	0.656	0.058	0	Malignant cell 1	NDUFA4L2
0	2.1729	0.762	0.218	0	Malignant cell 1	BGN
0	2.1187	0.5	0.079	0	Malignant cell 1	SLC2A1
0	2.08204	0.92	0.417	0	Malignant cell 1	ALDOA
0	2.08042	0.985	0.713	0	Malignant cell 1	EEF1D
0	2.03615	0.891	0.496	0	Malignant cell 1	ENO1
0	1.9927	0.833	0.097	0	Malignant cell 1	CPE
0	1.98169	0.619	0.066	0	Malignant cell 1	POSTN
0	1.98109	0.812	0.142	0	Malignant cell 1	LAPTM4B
0	1.97427	0.745	0.124	0	Malignant cell 1	IGF2
0	1.9561	0.408	0.264	0	Malignant cell 1	7SK.2
0	1.94112	0.892	0.403	0	Malignant cell 1	PKM
0	1.89965	0.759	0.217	0	Malignant cell 1	NUPR1
0	1.89109	0.506	0.011	0	Malignant cell 1	S100A2
0	1.88314	0.735	0.065	0	Malignant cell 1	CKB
0	1.86111	0.395	0.054	0	Malignant cell 1	CYTL1
0	1.84574	0.689	0.343	0	Malignant cell 1	CLEC2B
0	1.81362	0.911	0.44	0	Malignant cell 1	MIF
0	1.813	0.969	0.57	0	Malignant cell 1	ZFAS1
0	1.7823	0.319	0.011	0	Malignant cell 1	COMP
0	1.74316	0.945	0.515	0	Malignant cell 1	EIF3E
0	1.74087	0.395	0.006	0	Malignant cell 1	TNMD
0	1.71718	0.791	0.187	0	Malignant cell 1	PLP2
0	1.70082	0.748	0.324	0	Malignant cell 1	MRPS6
0	1.6891	0.947	0.428	0	Malignant cell 1	EIF3H
0	1.66799	0.491	0.025	0	Malignant cell 1	WFDC2
0	1.65471	0.371	0.008	0	Malignant cell 1	EDN3
0	1.65165	0.932	0.419	0	Malignant cell 1	EMP3
0	1.6508	0.522	0.185	0	Malignant cell 1	CLU
0	1.64176	0.866	0.391	0	Malignant cell 1	LY6E
0	1.62882	0.688	0.078	0	Malignant cell 1	FMOD
0	1.6254	0.649	0.232	0	Malignant cell 1	CTHRC1
0	1.58571	0.955	0.569	0	Malignant cell 1	TPI1
0	1.54597	0.557	0.035	0	Malignant cell 1	MFAP4
0	1.54403	0.949	0.66	0	Malignant cell 1	GNAS
0	1.53227	0.631	0.106	0	Malignant cell 1	MFAP2
0	1.5002	0.515	0.059	0	Malignant cell 1	SLC6A8
0	1.48865	0.84	0.155	0	Malignant cell 1	C8orf33
0	1.47998	0.976	0.621	0	Malignant cell 1	UQCRB
0	1.44613	0.987	0.875	0	Malignant cell 1	TPT1
0	1.4355	0.31	0.003	0	Malignant cell 1	NPY
0	1.43533	0.509	0.28	0	Malignant cell 1	AKAP12
0	2.36174	0.613	0.22	0	Fibroblast 2	MGP
0	2.24283	0.956	0.24	0	Fibroblast 2	DCN
0	2.17396	0.911	0.262	0	Fibroblast 2	SERPINF1
0	2.0152	0.46	0.099	0	Fibroblast 2	RARRES1
0	1.97281	0.942	0.236	0	Fibroblast 2	LUM
0	1.89281	0.295	0.081	0	Fibroblast 2	POSTN
0	1.87258	0.813	0.278	0	Fibroblast 2	IGFBP6
0	1.86669	0.827	0.23	0	Fibroblast 2	C1R
0	1.829	0.738	0.179	0	Fibroblast 2	NNMT
0	1.79018	0.77	0.247	0	Fibroblast 2	MMP2
0	1.76216	0.784	0.274	0	Fibroblast 2	ID3
0	1.75229	0.512	0.095	0	Fibroblast 2	CRABP2
0	1.72238	0.934	0.494	0	Fibroblast 2	GSN
0	1.719	0.827	0.216	0	Fibroblast 2	C1S
0	1.70053	0.948	0.458	0	Fibroblast 2	TIMP1
0	1.6873	0.587	0.25	0	Fibroblast 2	IGFBP5
0	1.66008	0.767	0.282	0	Fibroblast 2	FN1
0	1.63915	0.912	0.344	0	Fibroblast 2	COL6A2
0	1.63347	0.846	0.331	0	Fibroblast 2	COL6A1
0	1.63124	0.683	0.207	0	Fibroblast 2	CFH
0	1.59839	0.839	0.241	0	Fibroblast 2	PCOLCE
0	1.58665	0.878	0.288	0	Fibroblast 2	COL1A1
0	1.58661	0.838	0.26	0	Fibroblast 2	APOD
0	1.56049	0.361	0.142	0	Fibroblast 2	IGF2
0	1.54985	0.745	0.254	0	Fibroblast 2	S100A13
0	1.50389	0.327	0.093	0	Fibroblast 2	TAC1
0	1.47658	0.751	0.222	0	Fibroblast 2	TFPI
0	1.47068	0.791	0.28	0	Fibroblast 2	SERPING1
0	1.46773	0.68	0.193	0	Fibroblast 2	COL6A3
0	1.44306	0.62	0.146	0	Fibroblast 2	CTSK
0	1.42297	0.836	0.404	0	Fibroblast 2	TCF4
0	1.41737	0.407	0.143	0	Fibroblast 2	SFRP1
0	1.40599	0.588	0.144	0	Fibroblast 2	CYGB
0	1.36672	0.449	0.094	0	Fibroblast 2	GDF15
0	1.34622	0.376	0.074	0	Fibroblast 2	CRLF1
0	1.3406	0.589	0.16	0	Fibroblast 2	FHL2
0	1.31892	0.951	0.509	0	Fibroblast 2	LGALS1
0	1.30474	0.819	0.289	0	Fibroblast 2	COL3A1
0	1.29049	0.572	0.215	0	Fibroblast 2	ID1
0	1.28684	0.544	0.223	0	Fibroblast 2	NME1
0	1.27989	0.536	0.243	0	Fibroblast 2	RARRES2
0	1.26718	0.981	0.706	0	Fibroblast 2	CD63
0	1.25636	0.599	0.145	0	Fibroblast 2	COLEC12
0	1.23142	0.925	0.366	0	Fibroblast 2	COL1A2
0	1.21634	0.442	0.128	0	Fibroblast 2	SMOC2
0	1.20935	0.535	0.154	0	Fibroblast 2	FBLN1
0	1.19171	0.433	0.054	0	Fibroblast 2	MXRA5
0	1.18216	0.688	0.223	0	Fibroblast 2	MXRA8
0	1.17779	0.512	0.108	0	Fibroblast 2	PDGFRL
0	1.1695	0.88	0.599	0	Fibroblast 2	S100A6
0	2.88436	0.857	0.256	0	Macrophage 3	AIF1
0	2.74992	0.856	0.222	0	Macrophage 3	C1QB
0	2.70684	0.765	0.195	0	Macrophage 3	APOC1
0	2.63952	0.847	0.235	0	Macrophage 3	C1QA
0	2.60156	0.918	0.325	0	Macrophage 3	APOE
0	2.36937	0.77	0.216	0	Macrophage 3	C1QC
0	2.14916	0.994	0.652	0	Macrophage 3	FTL
0	2.08911	0.35	0.098	0	Macrophage 3	HAMP
0	2.03951	0.545	0.23	0	Macrophage 3	C3
0	2.03538	0.404	0.147	0	Macrophage 3	FCGR3A
0	1.97728	0.86	0.362	0	Macrophage 3	HLA-DPA1
0	1.91983	0.862	0.358	0	Macrophage 3	HLA-DPB1
0	1.9007	0.431	0.179	0	Macrophage 3	CYBB
0	1.89913	0.284	0.092	0	Macrophage 3	F13A1
0	1.87769	0.661	0.263	0	Macrophage 3	FCER1G
0	1.866	0.285	0.134	0	Macrophage 3	EEF1G
0	1.82053	0.333	0.228	0	Macrophage 3	GABARAP
0	1.81108	0.816	0.303	0	Macrophage 3	TYROBP
0	1.79316	0.477	0.367	0	Macrophage 3	YWHAH
0	1.72536	0.357	0.141	0	Macrophage 3	GPR34
0	1.72426	0.619	0.257	0	Macrophage 3	CD14
0	1.71456	0.43	0.219	0	Macrophage 3	VAMP8
0	1.71238	0.748	0.574	0	Macrophage 3	MARCKS
0	1.71227	0.921	0.379	0	Macrophage 3	HLA-DRA
0	1.69485	0.733	0.54	0	Macrophage 3	NPC2
0	1.69373	0.477	0.327	0	Macrophage 3	RGS10
0	1.67651	0.346	0.203	0	Macrophage 3	MAF
0	1.65426	0.257	0.098	0	Macrophage 3	FOLR2
0	1.62256	0.626	0.574	0	Macrophage 3	ARPC3
0	1.56839	0.401	0.211	0	Macrophage 3	CD68
0	1.53027	0.49	0.23	0	Macrophage 3	MS4A6A
0	1.52183	0.492	0.277	0	Macrophage 3	CTSS
0	1.47349	0.762	0.642	0	Macrophage 3	S100A11
0	1.4729	0.283	0.133	0	Macrophage 3	MS4A4A
0	1.46113	0.338	0.155	0	Macrophage 3	TREM2
0	1.45683	0.795	0.401	0	Macrophage 3	HLA-DRB1
0	1.45162	0.549	0.361	0	Macrophage 3	RNASET2
0	1.44722	0.478	0.361	0	Macrophage 3	GPX1
0	1.44656	0.295	0.148	0	Macrophage 3	LTC4S
0	1.42138	0.57	0.292	0	Macrophage 3	HLA-DRB5
0	1.41663	0.305	0.16	0	Macrophage 3	MNDA
0	1.4037	0.314	0.208	0	Macrophage 3	PYCARD
0	1.3815	0.356	0.203	0	Macrophage 3	CSF1R
0	1.38121	0.289	0.152	0	Macrophage 3	SPI1
0	1.38009	0.344	0.227	0	Macrophage 3	ATP5F1E
1.76e-281	1.42187	0.404	0.359	8.87e-277	Macrophage 3	KCTD12
1.73e-273	1.54524	0.3	0.224	8.73e-269	Macrophage 3	BIN1
1.02e-180	1.61492	0.271	0.22	5.15e-176	Macrophage 3	CYFIP1
2.29e-177	1.38013	0.419	0.446	1.15e-172	Macrophage 3	SH3BGRL
8.57e-177	1.40926	0.296	0.25	4.32e-172	Macrophage 3	RB1
0	3.40329	0.761	0.12	0	Bridging fibroblast	ABCA10
0	3.01303	0.776	0.178	0	Bridging fibroblast	ABCA6
0	2.95266	0.719	0.132	0	Bridging fibroblast	ABCA9
0	2.58398	0.735	0.189	0	Bridging fibroblast	LAMA2
0	2.54591	0.88	0.277	0	Bridging fibroblast	ABCA8
0	2.48839	0.613	0.161	0	Bridging fibroblast	PTCH1
0	2.38262	0.638	0.229	0	Bridging fibroblast	THBS1
0	2.28772	0.54	0.143	0	Bridging fibroblast	ANGPTL7
0	2.25482	0.645	0.258	0	Bridging fibroblast	UACA
0	2.21058	0.785	0.284	0	Bridging fibroblast	FN1
0	2.19463	0.532	0.161	0	Bridging fibroblast	CC2D1A
0	2.18581	0.57	0.191	0	Bridging fibroblast	TRIO
0	2.08428	0.666	0.196	0	Bridging fibroblast	COL6A3
0	2.06615	0.556	0.138	0	Bridging fibroblast	EBF2
0	2.06256	0.816	0.292	0	Bridging fibroblast	COL3A1
0	1.99351	0.907	0.29	0	Bridging fibroblast	COL1A1
0	1.97596	0.431	0.112	0	Bridging fibroblast	FBN2
0	1.96351	0.694	0.354	0	Bridging fibroblast	KCNQ1OT1
0	1.9499	0.482	0.118	0	Bridging fibroblast	PLEKHH2
0	1.94412	0.652	0.266	0	Bridging fibroblast	LAMB1
0	1.90604	0.73	0.366	0	Bridging fibroblast	DST
0	1.87385	0.619	0.211	0	Bridging fibroblast	CFH
0	1.87101	0.601	0.22	0	Bridging fibroblast	FBN1
0	1.85168	0.808	0.407	0	Bridging fibroblast	TCF4
0	1.83057	0.704	0.361	0	Bridging fibroblast	LRP1
0	1.82969	0.456	0.124	0	Bridging fibroblast	TNXB
0	1.79439	0.652	0.238	0	Bridging fibroblast	C1R
0	1.76453	0.642	0.294	0	Bridging fibroblast	LIMA1
0	1.75965	0.904	0.37	0	Bridging fibroblast	COL1A2
0	1.75468	0.748	0.337	0	Bridging fibroblast	COL6A1
0	1.73449	0.671	0.224	0	Bridging fibroblast	C1S
0	1.72233	0.484	0.15	0	Bridging fibroblast	EGFR
0	1.713	0.505	0.207	0	Bridging fibroblast	PEAK1
0	1.70683	0.409	0.098	0	Bridging fibroblast	SNED1
0	1.70156	0.584	0.305	0	Bridging fibroblast	FRMD4A
0	1.67437	0.601	0.229	0	Bridging fibroblast	TFPI
0	1.65415	0.766	0.245	0	Bridging fibroblast	LUM
0	1.65065	0.798	0.351	0	Bridging fibroblast	COL6A2
0	1.64467	0.75	0.376	0	Bridging fibroblast	SPTBN1
0	1.64418	0.599	0.19	0	Bridging fibroblast	CYP1B1
0	1.63167	0.505	0.209	0	Bridging fibroblast	VCAN
0	1.61454	0.468	0.164	0	Bridging fibroblast	FAT1
0	1.6079	0.459	0.154	0	Bridging fibroblast	SLIT3
0	1.60473	0.499	0.222	0	Bridging fibroblast	ARHGAP21
0	1.60429	0.442	0.144	0	Bridging fibroblast	PAMR1
0	1.5749	0.601	0.3	0	Bridging fibroblast	LAMC1
0	1.56226	0.558	0.248	0	Bridging fibroblast	RBMS3
0	1.55257	0.375	0.111	0	Bridging fibroblast	KIAA1755
0	1.55053	0.605	0.289	0	Bridging fibroblast	DLC1
0	1.54	0.548	0.298	0	Bridging fibroblast	NRP2
0	2.57853	0.981	0.347	0	Macrophage 4	GPX1
0	2.38427	0.942	0.219	0	Macrophage 4	CCL3
0	2.22601	0.713	0.057	0	Macrophage 4	CCL3L3
0	2.19695	0.886	0.133	0	Macrophage 4	IL8
0	2.12553	0.708	0.101	0	Macrophage 4	SPP1
0	2.08966	0.649	0.07	0	Macrophage 4	FCGBP
0	2.06598	0.873	0.195	0	Macrophage 4	APOC1
0	2.0457	0.963	0.35	0	Macrophage 4	RNASET2
0	1.87676	0.961	0.327	0	Macrophage 4	APOE
0	1.87548	0.818	0.141	0	Macrophage 4	TREM2
0	1.84386	0.898	0.355	0	Macrophage 4	YWHAH
0	1.79466	0.758	0.13	0	Macrophage 4	GPR34
0	1.73307	0.875	0.215	0	Macrophage 4	C1QC
0	1.72815	0.981	0.534	0	Macrophage 4	NPC2
0	1.72212	0.949	0.256	0	Macrophage 4	FCER1G
0	1.71601	0.991	0.3	0	Macrophage 4	TYROBP
0	1.69553	0.711	0.117	0	Macrophage 4	LILRB4
0	1.67338	0.739	0.212	0	Macrophage 4	BIN1
0	1.66399	0.911	0.261	0	Macrophage 4	CCL4
0	1.66056	0.908	0.25	0	Macrophage 4	RGS1
0	1.60712	0.883	0.225	0	Macrophage 4	C1QB
0	1.59696	0.892	0.242	0	Macrophage 4	GPR183
0	1.59441	0.908	0.236	0	Macrophage 4	C1QA
0	1.58796	0.836	0.244	0	Macrophage 4	EGR2
0	1.56524	0.639	0.082	0	Macrophage 4	ZNF90
0	1.56298	0.893	0.316	0	Macrophage 4	RGS10
0	1.53374	0.824	0.208	0	Macrophage 4	ALOX5AP
0	1.52063	0.717	0.185	0	Macrophage 4	C10orf54
0	1.45917	0.798	0.338	0	Macrophage 4	ARL5A
0	1.45068	0.645	0.125	0	Macrophage 4	VSIG4
0	1.43006	0.685	0.205	0	Macrophage 4	NINJ1
0	1.41958	0.947	0.337	0	Macrophage 4	LAPTM5
0	1.39888	0.663	0.138	0	Macrophage 4	LTC4S
0	1.39586	0.828	0.18	0	Macrophage 4	LST1
0	1.38496	0.631	0.091	0	Macrophage 4	HAMP
0	1.38315	0.817	0.269	0	Macrophage 4	FAM49B
0	1.36938	0.878	0.22	0	Macrophage 4	MS4A6A
0	1.36643	0.822	0.302	0	Macrophage 4	NBEAL1
0	1.35951	0.959	0.255	0	Macrophage 4	CD83
0	1.35896	0.966	0.397	0	Macrophage 4	IER3
0	1.35179	0.998	0.805	0	Macrophage 4	TMSB4X
0	1.34847	0.674	0.172	0	Macrophage 4	OTUD1
0	1.32213	0.682	0.302	0	Macrophage 4	HTRA1
0	1.30591	0.926	0.446	0	Macrophage 4	COTL1
0	1.29418	0.707	0.224	0	Macrophage 4	RILPL2
0	1.2861	0.63	0.238	0	Macrophage 4	AXL
0	1.28487	0.448	0.145	0	Macrophage 4	PLAU
0	1.28283	0.934	0.493	0	Macrophage 4	CTSB
0	1.28144	0.759	0.371	0	Macrophage 4	SELK
0	1.27906	0.46	0.07	0	Macrophage 4	RP11-386I14.4
0	3.6006	0.61	0.158	0	Bridging malignant cell	VEGFA
0	3.2498	0.77	0.479	0	Bridging malignant cell	XIST
0	3.23682	0.817	0.318	0	Bridging malignant cell	MEG3
0	3.22083	0.525	0.263	0	Bridging malignant cell	7SK.2
0	3.07647	0.317	0.088	0	Bridging malignant cell	ANGPT2
0	3.00893	0.738	0.353	0	Bridging malignant cell	KCNQ1OT1
0	2.46275	0.49	0.288	0	Bridging malignant cell	NDRG1
0	2.35858	0.447	0.24	0	Bridging malignant cell	PLEC
0	2.32048	0.547	0.237	0	Bridging malignant cell	AEBP1
0	2.20993	0.373	0.082	0	Bridging malignant cell	ITGA10
0	2.16807	0.494	0.14	0	Bridging malignant cell	IGF2
0	2.15477	0.438	0.078	0	Bridging malignant cell	POSTN
0	2.06811	0.404	0.101	0	Bridging malignant cell	GOLGA8A
0	2.06597	0.3	0.072	0	Bridging malignant cell	COL11A1
0	2.03245	0.421	0.176	0	Bridging malignant cell	TRPS1
0	2.02268	0.349	0.102	0	Bridging malignant cell	ZFHX4
0	1.99468	0.456	0.054	0	Bridging malignant cell	DLK1
0	1.91856	0.489	0.23	0	Bridging malignant cell	FGFR1
0	1.86576	0.302	0.059	0	Bridging malignant cell	AL132709.5
0	1.74842	0.586	0.369	0	Bridging malignant cell	NKTR
0	1.72337	0.253	0.096	0	Bridging malignant cell	LTBP1
0	1.7231	0.255	0.043	0	Bridging malignant cell	COL27A1
0	1.72268	0.289	0.071	0	Bridging malignant cell	ENO2
0	1.69638	0.521	0.361	0	Bridging malignant cell	GOLGA4
0	1.69203	0.279	0.031	0	Bridging malignant cell	SCXA
0	1.66757	0.435	0.265	0	Bridging malignant cell	TSPYL2
0	1.63833	0.268	0.091	0	Bridging malignant cell	SLC2A1
0	1.63003	0.413	0.286	0	Bridging malignant cell	AKAP12
0	1.62784	0.622	0.462	0	Bridging malignant cell	AKAP9
0	1.60192	0.272	0.073	0	Bridging malignant cell	SLC6A8
0	1.57002	0.312	0.116	0	Bridging malignant cell	PKD1
0	1.55029	0.759	0.694	0	Bridging malignant cell	FUS
0	1.5081	0.264	0.064	0	Bridging malignant cell	IGF2BP2
0	1.48543	0.49	0.345	0	Bridging malignant cell	SOX4
0	1.47896	0.335	0.205	0	Bridging malignant cell	HSPA1B
0	1.46342	0.348	0.199	0	Bridging malignant cell	EIF3B
0	1.46262	0.29	0.142	0	Bridging malignant cell	PXDN
0	1.46061	0.531	0.416	0	Bridging malignant cell	LUC7L3
0	1.45281	0.326	0.172	0	Bridging malignant cell	SUN1
0	1.44735	0.265	0.107	0	Bridging malignant cell	CRISPLD1
0	1.4443	0.303	0.149	0	Bridging malignant cell	FARP1
0	1.43221	0.342	0.189	0	Bridging malignant cell	UBR5
0	1.42327	0.252	0.087	0	Bridging malignant cell	INTS1
0	1.42174	0.407	0.204	0	Bridging malignant cell	COL6A3
0	1.39905	0.381	0.25	0	Bridging malignant cell	RBM5
0	1.38851	0.762	0.7	0	Bridging malignant cell	SON
0	1.38184	0.287	0.16	0	Bridging malignant cell	RP11-14N7.2
0	1.37334	0.398	0.272	0	Bridging malignant cell	ZNF638
7.6e-139	1.55458	0.403	0.39	3.83e-134	Bridging malignant cell	PNN
4.41e-48	1.72357	0.274	0.265	2.22e-43	Bridging malignant cell	ARHGAP5
0	5.25577	0.919	0.021	0	Pericyte	RGS5
0	4.99673	0.88	0.12	0	Pericyte	TAGLN
0	4.93934	0.846	0.094	0	Pericyte	ACTA2
0	3.73008	0.893	0.238	0	Pericyte	TPM2
0	3.71061	0.864	0.062	0	Pericyte	NDUFA4L2
0	3.7	0.879	0.173	0	Pericyte	ADIRF
0	3.69156	0.924	0.26	0	Pericyte	MYL9
0	3.27949	0.978	0.391	0	Pericyte	CALD1
0	3.17679	0.85	0.108	0	Pericyte	CPE
0	3.06426	0.839	0.063	0	Pericyte	NOTCH3
0	3.05683	0.886	0.277	0	Pericyte	TPM1
0	2.96526	0.494	0.021	0	Pericyte	MYH11
0	2.93737	0.746	0.039	0	Pericyte	PPP1R14A
0	2.9299	0.676	0.007	0	Pericyte	HIGD1B
0	2.76172	0.819	0.227	0	Pericyte	COL18A1
0	2.74186	0.541	0.029	0	Pericyte	STEAP4
0	2.6856	0.982	0.377	0	Pericyte	IGFBP7
0	2.67085	0.822	0.118	0	Pericyte	MCAM
0	2.62477	0.856	0.438	0	Pericyte	DSTN
0	2.60799	0.739	0.105	0	Pericyte	SYNPO2
0	2.56543	0.814	0.232	0	Pericyte	C11orf96
0	2.5369	0.728	0.068	0	Pericyte	MYLK
0	2.52896	0.791	0.146	0	Pericyte	PDGFRB
0	2.46664	0.667	0.166	0	Pericyte	CRIP1
0	2.41403	0.864	0.224	0	Pericyte	BGN
0	2.40316	0.747	0.059	0	Pericyte	TINAGL1
0	2.34812	0.601	0.006	0	Pericyte	COX4I2
0	2.2677	0.804	0.131	0	Pericyte	EPAS1
0	2.26524	0.519	0.095	0	Pericyte	THY1
0	2.24526	0.654	0.053	0	Pericyte	TBX2
0	2.22838	0.831	0.277	0	Pericyte	ID3
0	2.21732	0.578	0.04	0	Pericyte	CCDC102B
0	2.21562	0.665	0.095	0	Pericyte	JAG1
0	2.17204	0.789	0.175	0	Pericyte	CAV1
0	2.14218	0.611	0.02	0	Pericyte	GJA4
0	2.1127	0.71	0.263	0	Pericyte	COL4A1
0	2.0807	0.704	0.169	0	Pericyte	ITGA1
0	2.0461	0.63	0.088	0	Pericyte	MYO1B
0	2.04061	0.755	0.277	0	Pericyte	COL4A2
0	2.0283	0.63	0.075	0	Pericyte	HES4
0	2.02175	0.783	0.273	0	Pericyte	EPS8
0	1.98945	0.599	0.087	0	Pericyte	CSRP2
0	1.9654	0.792	0.213	0	Pericyte	PLAC9
0	1.95707	0.781	0.239	0	Pericyte	MAP1B
0	1.93143	0.903	0.313	0	Pericyte	SPARCL1
0	1.92114	0.612	0.162	0	Pericyte	ADAMTS1
0	1.90514	0.86	0.325	0	Pericyte	NR2F2
0	1.89724	0.768	0.254	0	Pericyte	MFGE8
0	1.87503	0.455	0.01	0	Pericyte	ABCC9
0	1.87255	0.596	0.073	0	Pericyte	FRZB
0	4.0247	0.963	0.14	0	CDKN2A+ Schwann cell	PTN
0	3.47039	0.559	0.1	0	CDKN2A+ Schwann cell	C2orf40
0	3.03967	0.819	0.211	0	CDKN2A+ Schwann cell	FXYD1
0	3.01238	0.904	0.336	0	CDKN2A+ Schwann cell	PMP22
0	2.89078	0.746	0.092	0	CDKN2A+ Schwann cell	NRXN1
0	2.88682	0.766	0.204	0	CDKN2A+ Schwann cell	METRN
0	2.78217	0.859	0.276	0	CDKN2A+ Schwann cell	CD9
0	2.77321	0.972	0.141	0	CDKN2A+ Schwann cell	S100B
0	2.72319	0.64	0.078	0	CDKN2A+ Schwann cell	CAVIN3
0	2.65438	0.694	0.221	0	CDKN2A+ Schwann cell	SOD3
0	2.55151	0.744	0.117	0	CDKN2A+ Schwann cell	LGI4
0	2.53123	0.64	0.139	0	CDKN2A+ Schwann cell	PDGFA
0	2.51822	0.405	0.008	0	CDKN2A+ Schwann cell	PCSK2
0	2.47991	0.557	0.057	0	CDKN2A+ Schwann cell	PRIMA1
0	2.47252	0.467	0.029	0	CDKN2A+ Schwann cell	COL20A1
0	2.46522	0.504	0.075	0	CDKN2A+ Schwann cell	PTPRZ1
0	2.45372	0.862	0.147	0	CDKN2A+ Schwann cell	GPM6B
0	2.43056	0.654	0.17	0	CDKN2A+ Schwann cell	PRSS23
0	2.42101	0.391	0.141	0	CDKN2A+ Schwann cell	CDKN2A
0	2.38162	0.686	0.364	0	CDKN2A+ Schwann cell	PRNP
0	2.35155	0.932	0.382	0	CDKN2A+ Schwann cell	S100A10
0	2.32721	0.549	0.085	0	CDKN2A+ Schwann cell	MPZ
0	2.31055	0.549	0.116	0	CDKN2A+ Schwann cell	ITIH5
0	2.26215	0.477	0.056	0	CDKN2A+ Schwann cell	MMP17
0	2.25413	0.878	0.487	0	CDKN2A+ Schwann cell	TUBA1A
0	2.24453	0.718	0.157	0	CDKN2A+ Schwann cell	CRYAB
0	2.23072	0.511	0.226	0	CDKN2A+ Schwann cell	FGL2
0	2.22836	0.706	0.331	0	CDKN2A+ Schwann cell	MAGED2
0	2.22228	0.492	0.032	0	CDKN2A+ Schwann cell	SEMA3B
0	2.20938	0.598	0.119	0	CDKN2A+ Schwann cell	PLP1
0	2.20494	0.555	0.097	0	CDKN2A+ Schwann cell	SELENOM
0	2.18637	0.486	0.156	0	CDKN2A+ Schwann cell	NDRG2
0	2.17388	0.495	0.125	0	CDKN2A+ Schwann cell	TMEM176A
0	2.17176	0.587	0.125	0	CDKN2A+ Schwann cell	MCAM
0	2.16026	0.562	0.218	0	CDKN2A+ Schwann cell	CDC42EP5
0	2.15583	0.362	0.015	0	CDKN2A+ Schwann cell	SEMA3E
0	2.10371	0.837	0.377	0	CDKN2A+ Schwann cell	S100A4
0	2.06641	0.39	0.05	0	CDKN2A+ Schwann cell	CMTM5
0	2.03207	0.623	0.255	0	CDKN2A+ Schwann cell	GAS7
0	2.02529	0.576	0.193	0	CDKN2A+ Schwann cell	CADM1
0	2.02257	0.434	0.135	0	CDKN2A+ Schwann cell	TNFAIP6
0	2.02006	0.397	0.093	0	CDKN2A+ Schwann cell	PEG10
0	2.01096	0.54	0.179	0	CDKN2A+ Schwann cell	TMEM176B
0	1.99144	0.425	0.078	0	CDKN2A+ Schwann cell	SORBS2
0	1.97993	0.647	0.391	0	CDKN2A+ Schwann cell	HSBP1
0	1.95434	0.457	0.146	0	CDKN2A+ Schwann cell	SDC3
0	1.94304	0.637	0.218	0	CDKN2A+ Schwann cell	PLAC9
0	1.93577	0.534	0.212	0	CDKN2A+ Schwann cell	EMP2
0	1.93036	0.991	0.599	0	CDKN2A+ Schwann cell	S100A6
0	1.89579	0.541	0.123	0	CDKN2A+ Schwann cell	SELENOW
0	4.68204	0.85	0.094	0	Macrophage 5	RNASE1
0	3.16251	0.384	0.094	0	Macrophage 5	SELENOP
0	2.80458	0.66	0.084	0	Macrophage 5	F13A1
0	2.7889	0.423	0.2	0	Macrophage 5	SEPP1
0	2.78666	0.749	0.108	0	Macrophage 5	STAB1
0	2.71539	0.971	0.237	0	Macrophage 5	C1QA
0	2.71298	0.995	0.655	0	Macrophage 5	FTL
0	2.6908	0.763	0.193	0	Macrophage 5	LGMN
0	2.6111	0.844	0.284	0	Macrophage 5	DAB2
0	2.59888	0.706	0.168	0	Macrophage 5	PLTP
0	2.58924	0.773	0.086	0	Macrophage 5	FOLR2
0	2.54516	0.861	0.432	0	Macrophage 5	CTSD
0	2.49741	0.307	0.052	0	Macrophage 5	CXCL8
0	2.48617	0.55	0.114	0	Macrophage 5	HMOX1
0	2.45835	0.948	0.226	0	Macrophage 5	C1QB
0	2.36876	0.39	0.049	0	Macrophage 5	LYVE1
0	2.33512	0.953	0.252	0	Macrophage 5	CD14
0	2.30272	0.758	0.101	0	Macrophage 5	CD163
0	2.28226	0.945	0.495	0	Macrophage 5	CTSB
0	2.27421	0.535	0.064	0	Macrophage 5	CXCL3
0	2.23997	0.767	0.194	0	Macrophage 5	MAF
0	2.20085	0.498	0.148	0	Macrophage 5	GPNMB
0	2.17046	0.858	0.202	0	Macrophage 5	CD68
0	2.16456	0.355	0.017	0	Macrophage 5	MRC1
0	2.15048	0.945	0.216	0	Macrophage 5	C1QC
0	2.09753	0.87	0.21	0	Macrophage 5	MS4A7
0	2.07666	0.726	0.137	0	Macrophage 5	SLCO2B1
0	2.06457	0.978	0.656	0	Macrophage 5	PSAP
0	2.05926	0.86	0.38	0	Macrophage 5	CTSZ
0	2.048	0.751	0.329	0	Macrophage 5	CTSL
0	2.00801	0.749	0.122	0	Macrophage 5	MS4A4A
0	1.99593	0.798	0.172	0	Macrophage 5	CYBB
0	1.95846	0.832	0.192	0	Macrophage 5	CSF1R
0	1.90291	0.541	0.12	0	Macrophage 5	CXCL2
0	1.87218	0.923	0.401	0	Macrophage 5	IER3
0	1.86352	0.958	0.304	0	Macrophage 5	TYROBP
0	1.77973	0.844	0.224	0	Macrophage 5	MS4A6A
0	1.77888	0.869	0.27	0	Macrophage 5	CTSS
0	1.77697	0.79	0.193	0	Macrophage 5	FCGR2A
0	1.73571	0.865	0.445	0	Macrophage 5	GRN
0	1.70967	0.815	0.369	0	Macrophage 5	SOD2
0	1.68787	0.636	0.128	0	Macrophage 5	VSIG4
0	1.67235	0.885	0.261	0	Macrophage 5	FCER1G
0	1.65578	0.673	0.132	0	Macrophage 5	C5AR1
0	1.65455	0.418	0.13	0	Macrophage 5	SLC40A1
0	1.64179	0.882	0.26	0	Macrophage 5	AIF1
0	1.56867	0.535	0.057	0	Macrophage 5	MPEG1
0	1.54251	0.637	0.229	0	Macrophage 5	BLVRB
0	1.54081	0.533	0.105	0	Macrophage 5	LAIR1
0	1.53888	0.98	0.456	0	Macrophage 5	CD74
0	3.89421	0.87	0.107	0	Schwann cell 2	ITGB8
0	3.76742	0.897	0.09	0	Schwann cell 2	NRXN1
0	3.2844	0.934	0.258	0	Schwann cell 2	CDH19
0	2.93738	0.79	0.118	0	Schwann cell 2	LGI4
0	2.88033	0.684	0.114	0	Schwann cell 2	ITIH5
0	2.8325	0.625	0.097	0	Schwann cell 2	CHL1
0	2.82951	0.772	0.172	0	Schwann cell 2	SERPINE2
0	2.8062	0.822	0.15	0	Schwann cell 2	GPM6B
0	2.5349	0.602	0.199	0	Schwann cell 2	THBS2
0	2.51625	0.573	0.075	0	Schwann cell 2	PTPRZ1
0	2.48506	0.574	0.08	0	Schwann cell 2	ERBB3
0	2.44483	0.547	0.099	0	Schwann cell 2	MICALL2
0	2.35564	0.514	0.157	0	Schwann cell 2	SCN7A
0	2.34079	0.524	0.115	0	Schwann cell 2	SCD
0	2.32635	0.734	0.368	0	Schwann cell 2	DST
0	2.29913	0.481	0.105	0	Schwann cell 2	PCDH9
0	2.26782	0.542	0.174	0	Schwann cell 2	COL12A1
0	2.22711	0.636	0.245	0	Schwann cell 2	LAMA4
0	2.21252	0.411	0.087	0	Schwann cell 2	ADCY6
0	2.1986	0.523	0.137	0	Schwann cell 2	DMD
0	2.18773	0.538	0.147	0	Schwann cell 2	DAG1
0	2.17756	0.526	0.122	0	Schwann cell 2	PLP1
0	2.15455	0.488	0.117	0	Schwann cell 2	NTM
0	2.14429	0.801	0.32	0	Schwann cell 2	MEG3
0	2.11391	0.456	0.088	0	Schwann cell 2	MPZ
0	2.10978	0.76	0.283	0	Schwann cell 2	ABCA8
0	2.07304	0.378	0.039	0	Schwann cell 2	RELN
0	2.06171	0.435	0.104	0	Schwann cell 2	LPL
0	2.05421	0.53	0.167	0	Schwann cell 2	PLAT
0	2.05151	0.515	0.191	0	Schwann cell 2	PHLDB1
0	2.04587	0.475	0.187	0	Schwann cell 2	PROS1
0	2.03071	0.506	0.169	0	Schwann cell 2	STARD13
0	1.95821	0.495	0.199	0	Schwann cell 2	ITGAV
0	1.94043	0.629	0.291	0	Schwann cell 2	DLC1
0	1.93164	0.419	0.081	0	Schwann cell 2	SEMA3C
0	1.92881	0.542	0.195	0	Schwann cell 2	CADM1
0	1.92736	0.391	0.052	0	Schwann cell 2	L1CAM
0	1.91672	0.41	0.073	0	Schwann cell 2	HSPA12A
0	1.91503	0.463	0.149	0	Schwann cell 2	EHBP1
0	1.88438	0.537	0.215	0	Schwann cell 2	HSPG2
0	1.87532	0.399	0.068	0	Schwann cell 2	NCAM1
0	1.85945	0.464	0.18	0	Schwann cell 2	GPR155
0	1.84713	0.391	0.083	0	Schwann cell 2	PDZD2
0	1.84654	0.259	0.027	0	Schwann cell 2	SHH
0	1.84597	0.43	0.163	0	Schwann cell 2	TEAD1
0	1.81488	0.398	0.116	0	Schwann cell 2	ARHGEF10
0	1.81118	0.568	0.292	0	Schwann cell 2	AHR
0	1.80914	0.475	0.129	0	Schwann cell 2	MCAM
0	1.80821	0.552	0.195	0	Schwann cell 2	PMEPA1
0	1.80188	0.351	0.042	0	Schwann cell 2	SORCS1
0	4.3006	0.976	0.746	0	Malignant cell 2	HSP90AB1
0	3.52551	0.623	0.002	0	Malignant cell 2	OTOR
0	2.84847	0.993	0.754	0	Malignant cell 2	GAPDH
0	2.50531	0.655	0.14	0	Malignant cell 2	SFRP1
0	2.41517	0.578	0.019	0	Malignant cell 2	COL2A1
0	2.3987	0.35	0.003	0	Malignant cell 2	CRABP1
0	2.36542	0.958	0.449	0	Malignant cell 2	MIF
0	2.3543	0.959	0.708	0	Malignant cell 2	VIM
0	2.31454	0.854	0.22	0	Malignant cell 2	MGP
0	2.30596	0.373	0.166	0	Malignant cell 2	VEGFA
0	2.20726	0.73	0.079	0	Malignant cell 2	TUBB2B
0	2.15375	0.9	0.31	0	Malignant cell 2	PSMB5
0	2.09975	0.832	0.273	0	Malignant cell 2	IGFBP2
0	2.09401	0.976	0.899	0	Malignant cell 2	EIF1
0	2.03504	0.701	0.255	0	Malignant cell 2	ARHGAP5
0	1.9802	0.293	0.031	0	Malignant cell 2	BCYRN1
0	1.92879	0.255	0.009	0	Malignant cell 2	UBE2C
0	1.91262	0.905	0.428	0	Malignant cell 2	ALDOA
0	1.91026	0.972	0.81	0	Malignant cell 2	ACTG1
0	1.8847	0.847	0.263	0	Malignant cell 2	YIPF3
0	1.79992	0.842	0.452	0	Malignant cell 2	TUBB
0	1.77608	0.909	0.503	0	Malignant cell 2	ENO1
0	1.76353	0.974	0.697	0	Malignant cell 2	NPM1
0	1.72109	0.925	0.415	0	Malignant cell 2	LDHB
0	1.69911	0.572	0.054	0	Malignant cell 2	MDFI
0	1.64022	0.738	0.109	0	Malignant cell 2	HIST1H2BK
0	1.55262	0.912	0.462	0	Malignant cell 2	TOMM20
0	1.54935	0.599	0.026	0	Malignant cell 2	LSAMP
0	1.5478	0.792	0.177	0	Malignant cell 2	MEA1
0	1.53498	0.973	0.562	0	Malignant cell 2	GNB2L1
0	1.53488	0.651	0.249	0	Malignant cell 2	STMN1
0	1.52597	0.376	0.011	0	Malignant cell 2	S100A1
0	1.51793	0.707	0.112	0	Malignant cell 2	CCDC167
0	1.50543	0.579	0.033	0	Malignant cell 2	KALRN
0	1.50194	0.751	0.25	0	Malignant cell 2	ODC1
0	1.49555	0.645	0.115	0	Malignant cell 2	BNIP3
0	1.48137	0.848	0.251	0	Malignant cell 2	NGFRAP1
0	1.47142	0.901	0.412	0	Malignant cell 2	PKM
0	1.46423	0.812	0.246	0	Malignant cell 2	MRPL14
0	1.46359	0.899	0.318	0	Malignant cell 2	PHB2
0	1.45546	0.914	0.471	0	Malignant cell 2	EIF3F
0	1.4436	0.904	0.319	0	Malignant cell 2	SEPW1
0	1.44298	0.782	0.307	0	Malignant cell 2	RCN2
0	1.4427	0.934	0.578	0	Malignant cell 2	TPI1
0	1.43981	0.824	0.444	0	Malignant cell 2	PDIA6
0	1.43295	0.551	0.147	0	Malignant cell 2	CKS1B
0	1.42913	0.562	0.187	0	Malignant cell 2	DNPH1
0	1.42911	0.897	0.349	0	Malignant cell 2	SNRPE
0	1.42849	0.946	0.465	0	Malignant cell 2	MZT2B
0	1.41558	0.406	0.071	0	Malignant cell 2	PTTG1
0	5.47114	0.902	0.031	0	Monocyte	S100A9
0	5.17548	0.81	0.018	0	Monocyte	S100A8
0	4.78887	0.98	0.158	0	Monocyte	LYZ
0	3.77325	0.663	0.022	0	Monocyte	EREG
0	3.63168	0.825	0.006	0	Monocyte	FCN1
0	3.41569	0.749	0.119	0	Monocyte	CXCL2
0	3.2881	0.62	0.06	0	Monocyte	G0S2
0	3.23097	0.431	0.038	0	Monocyte	RP11-1143G9.4
0	3.00859	0.78	0.206	0	Monocyte	VCAN
0	2.99054	0.952	0.271	0	Monocyte	CTSS
0	2.97064	0.48	0.002	0	Monocyte	S100A12
0	2.87642	0.617	0.065	0	Monocyte	CXCL3
0	2.77274	0.941	0.369	0	Monocyte	SOD2
0	2.67856	0.829	0.156	0	Monocyte	BCL2A1
0	2.6784	0.898	0.185	0	Monocyte	LST1
0	2.58538	0.294	0.03	0	Monocyte	CCL20
0	2.4283	0.766	0.087	0	Monocyte	SERPINA1
0	2.27843	0.71	0.063	0	Monocyte	CSTA
0	2.2711	0.998	0.798	0	Monocyte	FTH1
0	2.2702	0.846	0.202	0	Monocyte	IL1B
0	2.2682	0.612	0.135	0	Monocyte	PTGS2
0	2.25138	0.892	0.31	0	Monocyte	NAMPT
0	2.23475	0.986	0.307	0	Monocyte	TYROBP
0	2.23208	0.972	0.377	0	Monocyte	S100A4
0	2.16788	0.816	0.265	0	Monocyte	TYMP
0	2.11586	0.947	0.262	0	Monocyte	AIF1
0	2.10766	0.741	0.153	0	Monocyte	MNDA
0	2.06072	0.504	0.057	0	Monocyte	IL1RN
0	2.03916	0.879	0.253	0	Monocyte	PLAUR
0	1.9957	0.742	0.233	0	Monocyte	CD55
0	1.99057	0.499	0.007	0	Monocyte	CD300E
0	1.98474	0.996	0.656	0	Monocyte	FTL
0	1.96111	0.936	0.263	0	Monocyte	FCER1G
0	1.95021	0.609	0.146	0	Monocyte	IL8
0	1.92487	0.96	0.577	0	Monocyte	SH3BGRL3
0	1.91459	0.9	0.451	0	Monocyte	COTL1
0	1.90725	0.913	0.526	0	Monocyte	NFKBIA
0	1.85375	0.407	0.011	0	Monocyte	LGALS2
0	1.8488	0.861	0.335	0	Monocyte	CD44
0	1.84066	0.517	0.113	0	Monocyte	PPIF
0	1.81197	0.548	0.056	0	Monocyte	STXBP2
0	1.79965	0.509	0.212	0	Monocyte	PLIN2
0	1.79846	0.333	0.044	0	Monocyte	C15orf48
0	1.79437	0.488	0.012	0	Monocyte	CFP
0	1.79418	0.578	0.046	0	Monocyte	NCF2
0	1.76836	0.684	0.147	0	Monocyte	SAMSN1
0	1.76241	0.296	0.041	0	Monocyte	AREG
0	1.73917	0.562	0.059	0	Monocyte	MPEG1
0	1.67313	0.755	0.18	0	Monocyte	LCP1
0	1.65315	0.867	0.428	0	Monocyte	TSPO
0	3.26291	0.943	0.266	0	Fibroblast 3	APOD
0	2.57977	0.891	0.248	0	Fibroblast 3	LUM
0	2.49071	0.362	0.099	0	Fibroblast 3	CST1
0	2.38518	0.555	0.147	0	Fibroblast 3	ANGPTL7
0	2.3769	0.93	0.252	0	Fibroblast 3	DCN
0	2.17438	0.823	0.274	0	Fibroblast 3	SERPINF1
0	2.04467	0.772	0.298	0	Fibroblast 3	COL3A1
0	2.04083	0.694	0.241	0	Fibroblast 3	C1R
0	2.00626	0.928	0.466	0	Fibroblast 3	TIMP1
0	1.9932	0.564	0.173	0	Fibroblast 3	PTGDS
0	1.93217	0.783	0.299	0	Fibroblast 3	COL1A1
0	1.85088	0.642	0.193	0	Fibroblast 3	CYP1B1
0	1.83347	0.945	0.691	0	Fibroblast 3	CST3
0	1.80512	0.685	0.228	0	Fibroblast 3	C1S
0	1.79317	0.61	0.254	0	Fibroblast 3	IGFBP5
0	1.75662	0.663	0.291	0	Fibroblast 3	FN1
0	1.7299	0.648	0.259	0	Fibroblast 3	OLFML3
0	1.69691	0.916	0.383	0	Fibroblast 3	IGFBP7
0	1.69105	0.519	0.151	0	Fibroblast 3	SCRG1
0	1.67758	0.811	0.377	0	Fibroblast 3	COL1A2
0	1.65955	0.604	0.209	0	Fibroblast 3	GPC3
0	1.65768	0.499	0.146	0	Fibroblast 3	PAMR1
0	1.65407	0.536	0.195	0	Fibroblast 3	THBS4
0	1.6496	0.808	0.372	0	Fibroblast 3	IGFBP4
0	1.64925	0.585	0.187	0	Fibroblast 3	OGN
0	1.60012	0.624	0.257	0	Fibroblast 3	MMP2
0	1.58284	0.717	0.348	0	Fibroblast 3	TGFBI
0	1.57117	0.928	0.517	0	Fibroblast 3	LGALS1
0	1.56039	0.672	0.253	0	Fibroblast 3	PCOLCE
0	1.54134	0.568	0.286	0	Fibroblast 3	SRM
0	1.51182	0.779	0.322	0	Fibroblast 3	IFI27
0	1.51168	0.742	0.356	0	Fibroblast 3	COL6A2
0	1.50597	0.531	0.198	0	Fibroblast 3	LAMA2
0	1.48652	0.568	0.234	0	Fibroblast 3	MIA
0	1.4625	0.627	0.291	0	Fibroblast 3	SERPING1
0	1.45592	0.878	0.502	0	Fibroblast 3	GSN
0	1.43949	0.566	0.216	0	Fibroblast 3	CFH
0	1.43281	0.51	0.198	0	Fibroblast 3	CXCL12
0	1.42827	0.714	0.288	0	Fibroblast 3	IGFBP6
0	1.4043	0.347	0.145	0	Fibroblast 3	IGF2
0	1.3538	0.411	0.139	0	Fibroblast 3	CPXM1
0	1.34967	0.6	0.309	0	Fibroblast 3	IFI6
0	1.34374	0.441	0.167	0	Fibroblast 3	SRPX
0	1.33786	0.922	0.712	0	Fibroblast 3	CD63
0	1.32776	0.464	0.154	0	Fibroblast 3	COLEC12
0	1.30321	0.511	0.2	0	Fibroblast 3	OLFML2B
0	1.28851	0.629	0.323	0	Fibroblast 3	FSTL1
0	1.27597	0.3	0.108	0	Fibroblast 3	RARRES1
0	1.2701	0.457	0.166	0	Fibroblast 3	CFI
0	1.26967	0.928	0.788	0	Fibroblast 3	SERF2
0	6.34445	0.855	0.015	0	NK cell	GNLY
0	4.44816	0.982	0.085	0	NK cell	NKG7
0	4.02559	0.79	0.025	0	NK cell	GZMB
0	3.62468	0.791	0.033	0	NK cell	PRF1
0	3.04739	0.71	0.015	0	NK cell	KLRD1
0	2.97231	0.865	0.1	0	NK cell	GZMA
0	2.96924	0.788	0.056	0	NK cell	CTSW
0	2.91541	0.868	0.092	0	NK cell	CST7
0	2.69773	0.663	0.04	0	NK cell	CD247
0	2.66742	0.515	0.042	0	NK cell	FGFBP2
0	2.65749	0.61	0.047	0	NK cell	GZMH
0	2.57768	0.451	0.029	0	NK cell	XCL2
0	2.47848	0.648	0.085	0	NK cell	CD7
0	2.47171	0.595	0.065	0	NK cell	HOPX
0	2.41765	0.518	0.025	0	NK cell	IL2RB
0	2.39098	0.656	0.057	0	NK cell	GZMM
0	2.38291	0.552	0.041	0	NK cell	PLAC8
0	2.3822	0.469	0.005	0	NK cell	KLRF1
0	2.36891	0.619	0.052	0	NK cell	KLRB1
0	2.32502	0.744	0.181	0	NK cell	LCP1
0	2.2541	0.648	0.093	0	NK cell	RUNX3
0	2.21645	0.808	0.152	0	NK cell	CCL5
0	2.21589	0.726	0.202	0	NK cell	ARL4C
0	2.21392	0.887	0.285	0	NK cell	HCST
0	2.1394	0.285	0.015	0	NK cell	MYOM2
0	2.02759	0.627	0.198	0	NK cell	EFHD2
0	2.0078	0.677	0.32	0	NK cell	CREM
0	1.97053	0.638	0.122	0	NK cell	RAC2
0	1.96315	0.93	0.685	0	NK cell	PFN1
0	1.88538	0.355	0.018	0	NK cell	CLIC3
0	1.84709	0.601	0.082	0	NK cell	IL2RG
0	1.8218	0.602	0.17	0	NK cell	IL32
0	1.7959	0.851	0.319	0	NK cell	PTPRC
0	1.74885	0.385	0.173	0	NK cell	CMC1
0	1.69735	0.409	0.029	0	NK cell	MATK
0	1.68356	0.577	0.145	0	NK cell	CD52
0	1.6201	0.861	0.616	0	NK cell	MYL12A
0	1.61071	0.714	0.252	0	NK cell	CORO1A
0	1.60508	0.46	0.091	0	NK cell	SLC38A1
0	1.58873	0.422	0.063	0	NK cell	SYTL3
0	1.58411	0.97	0.697	0	NK cell	HLA-C
0	1.57353	0.865	0.579	0	NK cell	SH3BGRL3
0	1.5694	0.469	0.098	0	NK cell	AKNA
0	1.56828	0.526	0.247	0	NK cell	ABHD17A
0	1.56626	0.657	0.371	0	NK cell	JAK1
0	1.52932	0.384	0.03	0	NK cell	SAMD3
0	1.5155	0.928	0.718	0	NK cell	CALM1
0	1.49539	0.506	0.15	0	NK cell	FCGR3A
0	1.49155	0.432	0.085	0	NK cell	BIN2
0	1.48268	0.551	0.148	0	NK cell	CD48
0	6.37472	0.857	0.022	0	CXCL14+ Fibroblast	CXCL14
0	5.79687	0.878	0.148	0	CXCL14+ Fibroblast	CFD
0	5.15755	0.724	0.022	0	CXCL14+ Fibroblast	SFRP2
0	4.8631	0.367	0.004	0	CXCL14+ Fibroblast	PLA2G2A
0	4.65317	0.959	0.121	0	CXCL14+ Fibroblast	CCDC80
0	3.94225	0.853	0.031	0	CXCL14+ Fibroblast	MFAP5
0	3.60854	0.951	0.223	0	CXCL14+ Fibroblast	MGP
0	3.57474	0.634	0.003	0	CXCL14+ Fibroblast	WISP2
0	3.54021	0.859	0.157	0	CXCL14+ Fibroblast	FBLN1
0	3.48141	0.885	0.096	0	CXCL14+ Fibroblast	THY1
0	3.43537	0.845	0.07	0	CXCL14+ Fibroblast	EFEMP1
0	3.35404	0.624	0.176	0	CXCL14+ Fibroblast	SFRP4
0	3.15746	0.922	0.299	0	CXCL14+ Fibroblast	COL3A1
0	3.11642	0.997	0.255	0	CXCL14+ Fibroblast	DCN
0	3.07313	0.685	0.138	0	CXCL14+ Fibroblast	IGF1
0	3.04067	0.805	0.113	0	CXCL14+ Fibroblast	COL14A1
0	3.03665	0.927	0.2	0	CXCL14+ Fibroblast	COL6A3
0	2.86224	0.822	0.223	0	CXCL14+ Fibroblast	FBN1
0	2.8187	0.762	0.125	0	CXCL14+ Fibroblast	TNXB
0	2.66028	0.9	0.219	0	CXCL14+ Fibroblast	PLAC9
0	2.65535	0.972	0.34	0	CXCL14+ Fibroblast	COL6A1
0	2.60579	0.962	0.227	0	CXCL14+ Fibroblast	C1S
0	2.56992	0.991	0.355	0	CXCL14+ Fibroblast	COL6A2
0	2.52546	0.991	0.377	0	CXCL14+ Fibroblast	COL1A2
0	2.52112	0.949	0.241	0	CXCL14+ Fibroblast	C1R
0	2.47103	0.839	0.127	0	CXCL14+ Fibroblast	PRRX1
0	2.46375	0.805	0.163	0	CXCL14+ Fibroblast	FBLN2
0	2.45541	0.891	0.214	0	CXCL14+ Fibroblast	CFH
0	2.42783	0.779	0.118	0	CXCL14+ Fibroblast	CPE
0	2.39972	0.62	0.059	0	CXCL14+ Fibroblast	MXRA5
0	2.39812	0.942	0.299	0	CXCL14+ Fibroblast	COL1A1
0	2.37265	0.688	0.048	0	CXCL14+ Fibroblast	MFAP4
0	2.34233	0.522	0.197	0	CXCL14+ Fibroblast	THBS4
0	2.33597	0.85	0.209	0	CXCL14+ Fibroblast	VCAN
0	2.3148	0.949	0.275	0	CXCL14+ Fibroblast	SERPINF1
0	2.29964	0.934	0.288	0	CXCL14+ Fibroblast	SERPING1
0	2.26742	0.917	0.32	0	CXCL14+ Fibroblast	FSTL1
0	2.23091	0.659	0.145	0	CXCL14+ Fibroblast	SFRP1
0	2.23043	0.514	0.011	0	CXCL14+ Fibroblast	DPT
0	2.20103	0.491	0.018	0	CXCL14+ Fibroblast	TNNT3
0	2.17876	0.565	0.194	0	CXCL14+ Fibroblast	CLU
0	2.15406	0.677	0.024	0	CXCL14+ Fibroblast	CHRDL1
0	2.14524	0.859	0.186	0	CXCL14+ Fibroblast	OGN
0	2.14159	0.701	0.089	0	CXCL14+ Fibroblast	CD248
0	2.135	0.838	0.346	0	CXCL14+ Fibroblast	TIMP3
0	2.12528	0.571	0.059	0	CXCL14+ Fibroblast	ASPN
0	2.09185	0.753	0.197	0	CXCL14+ Fibroblast	CXCL12
0	2.08731	0.767	0.174	0	CXCL14+ Fibroblast	PRSS23
0	2.06054	0.978	0.503	0	CXCL14+ Fibroblast	GSN
0	2.0386	0.808	0.137	0	CXCL14+ Fibroblast	FBLN5
0	1.7498	0.422	0.219	0	SORL1 Macrophage	SORL1
0	1.72734	0.392	0.201	0	SORL1 Macrophage	NABP1
0	1.7084	0.948	0.804	0	SORL1 Macrophage	NEAT1
0	1.68159	0.3	0.119	0	SORL1 Macrophage	SLC8A1
0	1.6191	0.271	0.09	0	SORL1 Macrophage	ITGAX
0	1.60617	0.29	0.111	0	SORL1 Macrophage	ADAM28
0	1.55437	0.388	0.166	0	SORL1 Macrophage	MSR1
0	1.53986	0.283	0.121	0	SORL1 Macrophage	STAB1
0	1.41884	0.271	0.115	0	SORL1 Macrophage	CSF3R
0	1.37619	0.366	0.183	0	SORL1 Macrophage	IFI30
0	1.24795	0.595	0.34	0	SORL1 Macrophage	SGK1
2.38e-297	1.66373	0.312	0.155	1.2e-292	SORL1 Macrophage	DOCK4
1.24e-282	1.15765	0.432	0.238	6.25e-278	SORL1 Macrophage	C3
3.03e-280	1.65642	0.482	0.357	1.53e-275	SORL1 Macrophage	MEF2A
9.46e-273	1.60038	0.25	0.109	4.76e-268	SORL1 Macrophage	SLC11A1
3.24e-260	1.27648	0.358	0.193	1.63e-255	SORL1 Macrophage	CLEC7A
1.18e-232	1.39665	0.278	0.139	5.97e-228	SORL1 Macrophage	ADAP2
2.42e-206	1.35983	0.418	0.291	1.22e-201	SORL1 Macrophage	PLXDC2
1.26e-185	1.52358	0.298	0.177	6.32e-181	SORL1 Macrophage	ITPR2
1.77e-184	1.45292	0.283	0.163	8.91e-180	SORL1 Macrophage	TET2
2.87e-179	1.21079	0.538	0.487	1.44e-174	SORL1 Macrophage	XIST
3.48e-173	1.20031	0.573	0.598	1.75e-168	SORL1 Macrophage	SRRM2
5.62e-165	1.47897	0.349	0.24	2.83e-160	SORL1 Macrophage	DSE
9.65e-159	1.38788	0.497	0.427	4.86e-154	SORL1 Macrophage	REL
2.92e-155	1.39681	0.289	0.182	1.47e-150	SORL1 Macrophage	MYO9B
2.2e-140	1.26864	0.489	0.461	1.11e-135	SORL1 Macrophage	AKAP13
1.39e-136	1.2317	0.45	0.375	6.98e-132	SORL1 Macrophage	ZEB2
2.02e-132	1.20651	0.296	0.191	1.02e-127	SORL1 Macrophage	NFKBID
5.83e-117	1.40595	0.411	0.355	2.93e-112	SORL1 Macrophage	CFLAR
1e-112	1.45399	0.377	0.269	5.04e-108	SORL1 Macrophage	7SK.2
1.23e-94	1.33366	0.316	0.248	6.18e-90	SORL1 Macrophage	CCDC88A
5.09e-86	1.27924	0.365	0.32	2.56e-81	SORL1 Macrophage	VPS13C
2.19e-83	1.28691	0.393	0.365	1.1e-78	SORL1 Macrophage	CHD2
6.73e-80	1.51496	0.274	0.203	3.39e-75	SORL1 Macrophage	TCOF1
6.71e-74	1.11505	0.402	0.359	3.38e-69	SORL1 Macrophage	HIF1A
3.38e-64	1.25992	0.311	0.266	1.7e-59	SORL1 Macrophage	SLC4A7
1.05e-61	1.14521	0.251	0.191	5.3e-57	SORL1 Macrophage	ARHGAP24
1.12e-59	1.19105	0.366	0.341	5.63e-55	SORL1 Macrophage	RNF213
4.8e-57	1.14245	0.299	0.257	2.42e-52	SORL1 Macrophage	SMG1
1.85e-55	1.18594	0.301	0.263	9.31e-51	SORL1 Macrophage	USP15
2.77e-54	1.23054	0.261	0.21	1.4e-49	SORL1 Macrophage	CPEB4
5.83e-45	1.158	0.297	0.267	2.94e-40	SORL1 Macrophage	ATM
2.67e-41	1.46132	0.372	0.388	1.34e-36	SORL1 Macrophage	SPAG9
4.77e-39	1.16766	0.294	0.273	2.4e-34	SORL1 Macrophage	BAZ2B
8.16e-38	1.14616	0.259	0.227	4.11e-33	SORL1 Macrophage	SRGAP2
1.22e-34	1.17863	0.274	0.25	6.17e-30	SORL1 Macrophage	PARP14
1.41e-23	1.08629	0.275	0.27	7.1e-19	SORL1 Macrophage	CEP170
1.19e-22	1.16915	0.335	0.349	5.98e-18	SORL1 Macrophage	KDM6B
4.17e-16	1.14135	0.262	0.262	2.1e-11	SORL1 Macrophage	ABCA1
1.16e-12	1.0902	0.258	0.267	5.86e-08	SORL1 Macrophage	ZFYVE16
0	4.99269	0.962	0.172	0	Fibroblast 4	PTGDS
0	2.80213	0.939	0.232	0	Fibroblast 4	LTBP4
0	2.78772	0.811	0.191	0	Fibroblast 4	SPON2
0	2.61379	0.852	0.196	0	Fibroblast 4	MATN2
0	2.59043	0.681	0.035	0	Fibroblast 4	MFAP5
0	2.42455	0.712	0.093	0	Fibroblast 4	CAVIN1
0	2.41527	0.923	0.292	0	Fibroblast 4	FN1
0	2.39987	0.816	0.126	0	Fibroblast 4	TNXB
0	2.39698	0.996	0.257	0	Fibroblast 4	DCN
0	2.33005	0.873	0.175	0	Fibroblast 4	SFRP4
0	2.32233	0.966	0.272	0	Fibroblast 4	APOD
0	2.32218	0.905	0.187	0	Fibroblast 4	OGN
0	2.25071	0.884	0.221	0	Fibroblast 4	PLAC9
0	2.2474	0.977	0.252	0	Fibroblast 4	LUM
0	2.22683	0.884	0.302	0	Fibroblast 4	COL1A1
0	2.21918	0.886	0.349	0	Fibroblast 4	TGFBI
0	2.18482	0.952	0.379	0	Fibroblast 4	COL1A2
0	2.1385	0.828	0.301	0	Fibroblast 4	COL3A1
0	2.12426	0.799	0.153	0	Fibroblast 4	EGFR
0	2.07889	0.956	0.357	0	Fibroblast 4	COL6A2
0	2.05885	0.878	0.209	0	Fibroblast 4	GPC3
0	2.0574	0.911	0.254	0	Fibroblast 4	PCOLCE
0	2.02786	0.995	0.386	0	Fibroblast 4	IGFBP7
0	2.01275	0.988	0.504	0	Fibroblast 4	GSN
0	1.99793	0.762	0.291	0	Fibroblast 4	IGFBP6
0	1.94792	0.705	0.154	0	Fibroblast 4	ELOB
0	1.93952	0.931	0.332	0	Fibroblast 4	NR2F2
0	1.90973	0.928	0.229	0	Fibroblast 4	C1S
0	1.89751	0.609	0.081	0	Fibroblast 4	FRZB
0	1.88921	0.586	0.071	0	Fibroblast 4	LHFPL6
0	1.87441	0.715	0.199	0	Fibroblast 4	CXCL12
0	1.86168	0.928	0.277	0	Fibroblast 4	SERPINF1
0	1.85307	0.887	0.43	0	Fibroblast 4	TXN
0	1.84564	0.963	0.63	0	Fibroblast 4	CD81
0	1.80636	0.919	0.243	0	Fibroblast 4	C1R
0	1.79663	0.653	0.138	0	Fibroblast 4	FOXS1
0	1.78685	0.672	0.112	0	Fibroblast 4	TENM2
0	1.78308	0.673	0.133	0	Fibroblast 4	SMOC2
0	1.76267	0.718	0.134	0	Fibroblast 4	TAGLN
0	1.71798	0.798	0.224	0	Fibroblast 4	ISLR
0	1.68583	0.521	0.06	0	Fibroblast 4	ENTPD2
0	1.68332	0.666	0.149	0	Fibroblast 4	CRISPLD2
0	1.65909	0.826	0.217	0	Fibroblast 4	CFH
0	1.65081	0.988	0.519	0	Fibroblast 4	LGALS1
0	1.61978	0.86	0.291	0	Fibroblast 4	SERPING1
0	1.61636	0.611	0.119	0	Fibroblast 4	CLDN1
0	1.61046	0.697	0.187	0	Fibroblast 4	ADIRF
0	1.60595	0.326	0.021	0	Fibroblast 4	TNNT3
0	1.60517	0.653	0.288	0	Fibroblast 4	SRM
0	1.59688	0.463	0.032	0	Fibroblast 4	CLEC3B
0	1.59224	0.85	0.361	0	Inflammation responsive monocyte 1	GPX1
0	1.56523	0.993	0.37	0	Inflammation responsive monocyte 1	HLA-DPB1
0	1.54786	0.999	0.465	0	Inflammation responsive monocyte 1	CD74
0	1.47403	0.995	0.374	0	Inflammation responsive monocyte 1	HLA-DPA1
0	1.4257	0.924	0.264	0	Inflammation responsive monocyte 1	RGS1
0	1.3772	0.798	0.298	0	Inflammation responsive monocyte 1	HLA-DRB5
0	1.37518	0.948	0.3	0	Inflammation responsive monocyte 1	HLA-DQB1
0	1.29553	0.978	0.682	0	Inflammation responsive monocyte 1	ZFP36L2
0	1.23352	0.878	0.256	0	Inflammation responsive monocyte 1	GPR183
0	1.21629	0.919	0.248	0	Inflammation responsive monocyte 1	HLA-DQA1
0	1.2156	0.717	0.17	0	Inflammation responsive monocyte 1	LINC00936
0	1.20174	0.965	0.27	0	Inflammation responsive monocyte 1	CD83
0	1.19194	0.998	0.392	0	Inflammation responsive monocyte 1	HLA-DRA
0	1.19057	0.639	0.103	0	Inflammation responsive monocyte 1	HLA-DQA2
0	1.18576	0.97	0.54	0	Inflammation responsive monocyte 1	NR4A2
0	1.16189	0.996	0.41	0	Inflammation responsive monocyte 1	HLA-DRB1
0	1.15193	0.964	0.316	0	Inflammation responsive monocyte 1	TYROBP
0	1.11241	0.57	0.115	0	Inflammation responsive monocyte 1	PRMT10
0	1.10301	0.377	0.047	0	Inflammation responsive monocyte 1	FCER1A
0	1.08474	0.763	0.151	0	Inflammation responsive monocyte 1	IL8
0	1.07638	0.973	0.606	0	Inflammation responsive monocyte 1	DUSP1
0	1.07528	0.923	0.339	0	Inflammation responsive monocyte 1	SGK1
0	1.06225	0.697	0.314	0	Inflammation responsive monocyte 1	NBEAL1
0	1.06021	0.865	0.256	0	Inflammation responsive monocyte 1	CD37
0	1.05737	0.983	0.54	0	Inflammation responsive monocyte 1	SAT1
0	1.03933	0.902	0.364	0	Inflammation responsive monocyte 1	RNASET2
0	1.02113	0.873	0.431	0	Inflammation responsive monocyte 1	TSC22D3
0	1.01983	0.755	0.286	0	Inflammation responsive monocyte 1	RGS2
0	1.01785	0.526	0.095	0	Inflammation responsive monocyte 1	ZNF90
0	0.994772	0.826	0.318	0	Inflammation responsive monocyte 1	RGCC
0	0.989671	0.868	0.405	0	Inflammation responsive monocyte 1	KLF4
0	0.986991	0.87	0.271	0	Inflammation responsive monocyte 1	ITGB2
0	0.979519	0.791	0.368	0	Inflammation responsive monocyte 1	YWHAH
0	0.976566	0.734	0.234	0	Inflammation responsive monocyte 1	RILPL2
0	0.974483	0.898	0.303	0	Inflammation responsive monocyte 1	DUSP2
0	0.974284	0.921	0.158	0	Inflammation responsive monocyte 1	CCL5
0	0.96222	0.876	0.457	0	Inflammation responsive monocyte 1	COTL1
0	0.956876	0.665	0.157	0	Inflammation responsive monocyte 1	TREM2
0	0.956188	0.999	0.809	0	Inflammation responsive monocyte 1	TMSB4X
0	0.955495	0.871	0.386	0	Inflammation responsive monocyte 1	FXYD5
0	0.946153	0.886	0.256	0	Inflammation responsive monocyte 1	CORO1A
0	0.93026	0.884	0.491	0	Inflammation responsive monocyte 1	HERPUD1
0	0.925682	0.926	0.649	0	Inflammation responsive monocyte 1	ZFP36L1
0	0.924859	0.603	0.141	0	Inflammation responsive monocyte 1	PHACTR1
0	0.92474	0.896	0.544	0	Inflammation responsive monocyte 1	NPC2
0	0.919221	0.8	0.221	0	Inflammation responsive monocyte 1	ALOX5AP
0	0.913512	0.601	0.091	0	Inflammation responsive monocyte 1	CD7
0	0.912556	0.847	0.235	0	Inflammation responsive monocyte 1	MS4A6A
0	0.911598	0.821	0.441	0	Inflammation responsive monocyte 1	TMEM66
0	0.905748	0.73	0.172	0	Inflammation responsive monocyte 1	FYB
0	3.31122	0.778	0.058	0	Endothelial cell 2	RBP7
0	3.04304	0.953	0.041	0	Endothelial cell 2	RGS5
0	2.60779	0.857	0.107	0	Endothelial cell 2	ENPP2
0	2.60257	0.964	0.188	0	Endothelial cell 2	CAV1
0	2.59352	0.881	0.153	0	Endothelial cell 2	AQP1
0	2.56326	0.593	0.057	0	Endothelial cell 2	IGFBP3
0	2.46845	0.999	0.325	0	Endothelial cell 2	SPARCL1
0	2.41263	0.875	0.135	0	Endothelial cell 2	INSR
0	2.3544	0.951	0.246	0	Endothelial cell 2	GNG11
0	2.31267	0.932	0.145	0	Endothelial cell 2	EPAS1
0	2.26875	0.88	0.079	0	Endothelial cell 2	NDUFA4L2
0	2.22764	0.914	0.224	0	Endothelial cell 2	ID1
0	2.2138	0.97	0.288	0	Endothelial cell 2	ID3
0	2.20909	0.885	0.065	0	Endothelial cell 2	VWF
0	2.19816	0.8	0.056	0	Endothelial cell 2	CLDN5
0	2.17202	0.854	0.133	0	Endothelial cell 2	SLC9A3R2
0	2.10404	0.874	0.246	0	Endothelial cell 2	SPRY1
0	2.04513	0.668	0.055	0	Endothelial cell 2	STC1
0	2.03802	0.764	0.046	0	Endothelial cell 2	PLVAP
0	2.03374	0.862	0.082	0	Endothelial cell 2	CLEC14A
0	2.0005	0.942	0.282	0	Endothelial cell 2	TSC22D1
0	1.99717	0.943	0.412	0	Endothelial cell 2	TXNIP
0	1.99122	0.822	0.061	0	Endothelial cell 2	FLT1
0	1.9701	0.571	0.131	0	Endothelial cell 2	SELENOW
0	1.94666	0.986	0.521	0	Endothelial cell 2	A2M
0	1.93679	0.846	0.083	0	Endothelial cell 2	EMCN
0	1.89191	0.838	0.055	0	Endothelial cell 2	ESAM
0	1.88893	0.805	0.174	0	Endothelial cell 2	IFITM1
0	1.88751	0.997	0.39	0	Endothelial cell 2	IGFBP7
0	1.86503	0.867	0.189	0	Endothelial cell 2	ADIRF
0	1.85341	0.973	0.328	0	Endothelial cell 2	IFI27
0	1.84783	0.837	0.157	0	Endothelial cell 2	RAMP2
0	1.84343	0.885	0.207	0	Endothelial cell 2	CRIP2
0	1.82243	0.84	0.165	0	Endothelial cell 2	PDLIM1
0	1.79543	0.736	0.021	0	Endothelial cell 2	HIGD1B
0	1.78469	0.857	0.091	0	Endothelial cell 2	ANGPT2
0	1.78346	0.899	0.306	0	Endothelial cell 2	STOM
0	1.78094	0.732	0.04	0	Endothelial cell 2	SOX18
0	1.77317	0.82	0.124	0	Endothelial cell 2	CPE
0	1.77021	0.873	0.172	0	Endothelial cell 2	ARHGAP29
0	1.76271	0.794	0.074	0	Endothelial cell 2	TINAGL1
0	1.74852	0.915	0.275	0	Endothelial cell 2	MYL9
0	1.7458	0.506	0.024	0	Endothelial cell 2	ADGRF5
0	1.74503	0.735	0.033	0	Endothelial cell 2	GJA4
0	1.74105	0.844	0.083	0	Endothelial cell 2	PALMD
0	1.69106	0.703	0.057	0	Endothelial cell 2	TM4SF18
0	1.67853	0.466	0.029	0	Endothelial cell 2	CAVIN2
0	1.66192	0.991	0.427	0	Endothelial cell 2	SPARC
0	1.65694	0.759	0.096	0	Endothelial cell 2	EGFL7
0	1.64326	0.869	0.213	0	Endothelial cell 2	NFIB
0	3.45566	0.612	0.032	0	Inflammation responsive monocyte 2	CCL20
0	3.18635	0.833	0.128	0	Inflammation responsive monocyte 2	CXCL2
0	3.15199	0.585	0.069	0	Inflammation responsive monocyte 2	G0S2
0	2.54294	0.99	0.362	0	Inflammation responsive monocyte 2	GPX1
0	2.44544	0.963	0.152	0	Inflammation responsive monocyte 2	IL8
0	2.42866	0.77	0.116	0	Inflammation responsive monocyte 2	PRMT10
0	2.27693	0.578	0.043	0	Inflammation responsive monocyte 2	RP11-1143G9.4
0	2.22675	0.957	0.262	0	Inflammation responsive monocyte 2	PLAUR
0	2.1785	0.498	0.032	0	Inflammation responsive monocyte 2	EREG
0	2.1103	0.526	0.074	0	Inflammation responsive monocyte 2	CXCL3
0	2.06103	0.887	0.171	0	Inflammation responsive monocyte 2	LYZ
0	1.93241	0.907	0.182	0	Inflammation responsive monocyte 2	OLR1
0	1.91731	0.994	0.317	0	Inflammation responsive monocyte 2	TYROBP
0	1.8968	0.859	0.38	0	Inflammation responsive monocyte 2	SELK
0	1.87961	0.951	0.257	0	Inflammation responsive monocyte 2	GPR183
0	1.87715	1	0.801	0	Inflammation responsive monocyte 2	FTH1
0	1.78597	0.696	0.095	0	Inflammation responsive monocyte 2	ZNF90
0	1.75379	0.871	0.314	0	Inflammation responsive monocyte 2	NBEAL1
0	1.7095	0.787	0.235	0	Inflammation responsive monocyte 2	RILPL2
0	1.70158	0.447	0.04	0	Inflammation responsive monocyte 2	IL10
0	1.6789	0.984	0.545	0	Inflammation responsive monocyte 2	NPC2
0	1.63074	0.883	0.196	0	Inflammation responsive monocyte 2	LST1
0	1.62884	0.999	0.541	0	Inflammation responsive monocyte 2	SAT1
0	1.62118	0.747	0.317	0	Inflammation responsive monocyte 2	CHMP1B
0	1.60266	0.999	0.662	0	Inflammation responsive monocyte 2	FTL
0	1.56368	0.758	0.171	0	Inflammation responsive monocyte 2	LINC00936
0	1.55556	0.8	0.212	0	Inflammation responsive monocyte 2	APOC1
0	1.54401	0.983	0.411	0	Inflammation responsive monocyte 2	IER3
0	1.53985	0.625	0.143	0	Inflammation responsive monocyte 2	PTGS2
0	1.49112	0.706	0.167	0	Inflammation responsive monocyte 2	BCL2A1
0	1.44214	0.734	0.257	0	Inflammation responsive monocyte 2	HBEGF
0	1.42968	0.901	0.448	0	Inflammation responsive monocyte 2	CEBPB
0	1.41029	0.44	0.064	0	Inflammation responsive monocyte 2	IL1RN
0	1.40848	0.975	0.54	0	Inflammation responsive monocyte 2	ATP5E
0	1.4052	0.485	0.09	0	Inflammation responsive monocyte 2	OSM
0	1.39703	0.965	0.532	0	Inflammation responsive monocyte 2	NFKBIA
0	1.3729	0.946	0.212	0	Inflammation responsive monocyte 2	IL1B
0	1.32431	0.583	0.216	0	Inflammation responsive monocyte 2	INSIG1
0	1.32076	0.836	0.305	0	Inflammation responsive monocyte 2	DUSP2
0	1.29084	0.779	0.349	0	Inflammation responsive monocyte 2	ARL5A
0	1.25422	0.86	0.378	0	Inflammation responsive monocyte 2	SOD2
0	1.2273	0.46	0.08	0	Inflammation responsive monocyte 2	RP11-386I14.4
0	1.20384	0.855	0.236	0	Inflammation responsive monocyte 2	MS4A6A
0	1.20259	0.971	0.612	0	Inflammation responsive monocyte 2	PPP1R15A
0	1.18553	0.679	0.168	0	Inflammation responsive monocyte 2	C1orf162
0	1.18188	0.994	0.498	0	Inflammation responsive monocyte 2	SRGN
0	1.18165	0.723	0.316	0	Inflammation responsive monocyte 2	EIF4E
0	1.17245	0.892	0.273	0	Inflammation responsive monocyte 2	AIF1
0	1.16529	0.566	0.142	0	Inflammation responsive monocyte 2	PHACTR1
0	1.13473	0.512	0.094	0	Inflammation responsive monocyte 2	FAM26F
0	7.57045	0.988	0.002	0	Mast cell	TPSAB1
0	5.5123	0.841	0.011	0	Mast cell	HPGD
0	5.44664	0.897	0.001	0	Mast cell	CPA3
0	4.86145	0.615	0.001	0	Mast cell	CTSG
0	4.65684	0.85	0.048	0	Mast cell	HPGDS
0	3.61406	0.558	0.008	0	Mast cell	RGS13
0	3.60546	0.721	0.021	0	Mast cell	VWA5A
0	3.49667	0.728	0.189	0	Mast cell	CD69
0	3.39143	0.639	0.002	0	Mast cell	SLC18A2
0	3.10998	0.56	0.004	0	Mast cell	KIT
0	2.78358	0.463	0.002	0	Mast cell	C1orf186
0	2.73231	0.481	0	0	Mast cell	HDC
0	2.73206	0.681	0.155	0	Mast cell	CAPG
0	2.71161	0.496	0.04	0	Mast cell	GATA2
0	2.71057	0.487	0.004	0	Mast cell	IL1RL1
0	2.48369	0.359	0	0	Mast cell	MS4A2
0	2.38217	0.392	0.002	0	Mast cell	RP11-354E11.2
0	2.33794	0.916	0.61	0	Mast cell	ANXA1
0	2.20931	0.61	0.156	0	Mast cell	SAMSN1
0	2.18653	0.393	0.025	0	Mast cell	MAOB
0	2.05076	0.55	0.13	0	Mast cell	RAC2
0	2.02547	0.895	0.386	0	Mast cell	S100A4
0	2.01569	0.553	0.197	0	Mast cell	CLU
0	2.006	0.478	0.152	0	Mast cell	LTC4S
0	1.91884	0.784	0.274	0	Mast cell	FCER1G
0	1.91853	0.345	0.019	0	Mast cell	CALB2
0	1.90384	0.314	0.006	0	Mast cell	RAB27B
0	1.89032	0.855	0.589	0	Mast cell	CLIC1
0	1.87623	0.997	0.802	0	Mast cell	FTH1
0	1.85583	0.899	0.645	0	Mast cell	UBB
0	1.7581	0.615	0.224	0	Mast cell	ALOX5AP
0	1.6732	0.351	0.085	0	Mast cell	STX3
0	1.6391	0.315	0.055	0	Mast cell	BTK
0	1.56457	0.307	0.07	0	Mast cell	SMYD3
9.97e-306	1.60818	0.7	0.342	5.02e-301	Mast cell	ARHGDIB
2.04e-295	1.5191	0.359	0.096	1.03e-290	Mast cell	CD82
7.43e-270	1.81971	0.784	0.559	3.74e-265	Mast cell	LAPTM4A
5.46e-260	1.66636	0.323	0.087	2.75e-255	Mast cell	ADRB2
1.92e-249	2.07419	0.636	0.372	9.69e-245	Mast cell	LMO4
2.54e-245	1.63146	0.797	0.533	1.28e-240	Mast cell	NFKBIA
2.21e-228	1.75046	0.595	0.321	1.11e-223	Mast cell	CKLF
2.67e-220	1.82754	0.397	0.139	1.34e-215	Mast cell	GPR65
5.49e-200	1.75458	0.743	0.562	2.76e-195	Mast cell	PRDX1
1.12e-178	2.10791	0.588	0.381	5.65e-174	Mast cell	SELK
8.1e-165	1.61572	0.343	0.135	4.08e-160	Mast cell	ACSL4
5.24e-159	1.67648	0.306	0.107	2.64e-154	Mast cell	BIRC3
1.19e-149	1.65717	0.616	0.442	5.98e-145	Mast cell	CTSD
8.82e-142	1.49852	0.57	0.367	4.44e-137	Mast cell	ASAH1
1.6e-116	1.75968	0.433	0.252	8.08e-112	Mast cell	ANKRD28
6.59e-113	1.60873	0.444	0.265	3.32e-108	Mast cell	SERPINB1
0	5.02565	0.925	0.004	0	B cell	CD79A
0	3.78824	0.845	0.054	0	B cell	CD79B
0	3.61952	0.904	0.075	0	B cell	LTB
0	3.60299	0.788	0.006	0	B cell	MS4A1
0	3.31881	0.943	0.258	0	B cell	CD37
0	3.23882	0.657	0.002	0	B cell	VPREB3
0	3.05388	0.942	0.15	0	B cell	CD52
0	2.90125	0.874	0.3	0	B cell	CXCR4
0	2.48481	0.622	0.01	0	B cell	BANK1
0	2.34797	0.653	0.19	0	B cell	CD69
0	2.33963	0.758	0.086	0	B cell	PTPRCAP
0	2.14648	0.258	0.001	0	B cell	TCL1A
0	2.12106	0.522	0.071	0	B cell	HVCN1
0	2.01946	0.491	0.052	0	B cell	SELL
0	1.87034	0.842	0.303	0	B cell	HLA-DQB1
0	1.86138	0.308	0.003	0	B cell	IGJ
0	1.85892	0.96	0.467	0	B cell	CD74
0	1.84634	0.53	0.106	0	B cell	BIRC3
0	1.79704	0.374	0.007	0	B cell	HLA-DOB
0	1.75292	0.382	0.002	0	B cell	CD19
0	1.73861	0.531	0.081	0	B cell	NCF1
0	1.71488	0.355	0.003	0	B cell	FCRLA
0	1.70173	0.748	0.39	0	B cell	GLTSCR2
0	1.69237	0.626	0.168	0	B cell	LIMD2
0	1.69073	0.695	0.228	0	B cell	CD53
0	1.66979	0.365	0.018	0	B cell	FAIM3
0	1.64449	0.383	0.01	0	B cell	SPIB
0	1.644	0.747	0.258	0	B cell	CORO1A
0	1.63545	0.807	0.251	0	B cell	HLA-DQA1
0	1.58643	0.317	0.017	0	B cell	CCR7
0	1.57891	0.266	0.001	0	B cell	FCER2
0	1.53847	0.574	0.13	0	B cell	RAC2
0	1.48453	0.385	0.085	0	B cell	CD40
0	1.4791	0.615	0.154	0	B cell	CD48
0	1.46819	0.962	0.701	0	B cell	HLA-C
0	1.45608	0.294	0.015	0	B cell	LINC00926
0	1.44435	0.775	0.342	0	B cell	ARHGDIB
0	1.44155	0.834	0.353	0	B cell	LAPTM5
0	1.4254	0.897	0.412	0	B cell	HLA-DRB1
0	1.42444	0.411	0.063	0	B cell	RHOH
0	1.41724	0.467	0.116	0	B cell	POU2F2
0	1.41461	0.308	0.023	0	B cell	CD22
0	1.40805	0.859	0.57	0	B cell	GNB2L1
0	1.37973	0.31	0.065	0	B cell	RALGPS2
0	1.37849	0.439	0.107	0	B cell	ICAM3
0	1.37557	0.902	0.395	0	B cell	HLA-DRA
0	1.29766	0.289	0.044	0	B cell	FAM65B
1.12e-306	1.30026	0.955	0.789	5.64e-302	B cell	HLA-A
6.02e-188	1.48131	0.461	0.214	3.03e-183	B cell	SMIM14
1.12e-130	1.56352	0.664	0.493	5.62e-126	B cell	HERPUD1
0	6.66837	0.949	0.03	0	M-MDSC/FCGR3B+ monocyte	S100A8
0	6.16057	0.956	0.045	0	M-MDSC/FCGR3B+ monocyte	S100A9
0	5.07322	0.781	0.004	0	M-MDSC/FCGR3B+ monocyte	FCGR3B
0	4.85367	0.971	0.319	0	M-MDSC/FCGR3B+ monocyte	NAMPT
0	4.57584	0.975	0.519	0	M-MDSC/FCGR3B+ monocyte	IFITM2
0	4.4035	0.825	0.163	0	M-MDSC/FCGR3B+ monocyte	MNDA
0	4.27804	0.62	0.056	0	M-MDSC/FCGR3B+ monocyte	CXCL8
0	4.13088	0.765	0.115	0	M-MDSC/FCGR3B+ monocyte	CSF3R
0	4.02538	0.714	0.069	0	M-MDSC/FCGR3B+ monocyte	G0S2
0	3.85036	0.364	0.011	0	M-MDSC/FCGR3B+ monocyte	S100A12
0	3.7443	0.923	0.378	0	M-MDSC/FCGR3B+ monocyte	SOD2
0	3.71411	0.493	0.003	0	M-MDSC/FCGR3B+ monocyte	CMTM2
0	3.64122	0.733	0.282	0	M-MDSC/FCGR3B+ monocyte	SMCHD1
0	3.51229	0.524	0.102	0	M-MDSC/FCGR3B+ monocyte	GCA
0	3.51185	0.847	0.283	0	M-MDSC/FCGR3B+ monocyte	CTSS
0	3.45363	0.843	0.459	0	M-MDSC/FCGR3B+ monocyte	LITAF
0	3.4396	0.543	0.102	0	M-MDSC/FCGR3B+ monocyte	MXD1
0	3.43293	0.643	0.227	0	M-MDSC/FCGR3B+ monocyte	RNF149
0	3.43192	0.49	0.053	0	M-MDSC/FCGR3B+ monocyte	TMEM154
0	3.42447	0.488	0.074	0	M-MDSC/FCGR3B+ monocyte	LRRK2
0	3.41675	0.662	0.144	0	M-MDSC/FCGR3B+ monocyte	C5AR1
0	3.41384	0.667	0.217	0	M-MDSC/FCGR3B+ monocyte	BASP1
0	3.40332	0.456	0.018	0	M-MDSC/FCGR3B+ monocyte	VNN2
0	3.37254	0.593	0.182	0	M-MDSC/FCGR3B+ monocyte	SLC25A37
0	3.35678	0.475	0.01	0	M-MDSC/FCGR3B+ monocyte	AQP9
0	3.32002	0.828	0.287	0	M-MDSC/FCGR3B+ monocyte	RGS2
0	3.31068	0.513	0.144	0	M-MDSC/FCGR3B+ monocyte	PTGS2
0	3.30145	0.338	0.004	0	M-MDSC/FCGR3B+ monocyte	PROK2
0	3.28516	0.407	0.002	0	M-MDSC/FCGR3B+ monocyte	CXCR2
0	3.24147	0.556	0.11	0	M-MDSC/FCGR3B+ monocyte	FPR1
0	3.21295	0.402	0.039	0	M-MDSC/FCGR3B+ monocyte	LUCAT1
0	3.20944	0.372	0.015	0	M-MDSC/FCGR3B+ monocyte	RIPOR2
0	3.18765	0.453	0.081	0	M-MDSC/FCGR3B+ monocyte	NCF1
0	3.13202	0.34	0.003	0	M-MDSC/FCGR3B+ monocyte	S100P
0	3.11262	0.663	0.197	0	M-MDSC/FCGR3B+ monocyte	LST1
0	3.10959	0.443	0.056	0	M-MDSC/FCGR3B+ monocyte	NCF2
0	3.10927	0.695	0.19	0	M-MDSC/FCGR3B+ monocyte	LCP1
0	3.07799	0.366	0.03	0	M-MDSC/FCGR3B+ monocyte	MME
0	3.0759	0.425	0.053	0	M-MDSC/FCGR3B+ monocyte	SELL
0	3.04786	0.561	0.157	0	M-MDSC/FCGR3B+ monocyte	EVI2B
0	3.04631	0.429	0.111	0	M-MDSC/FCGR3B+ monocyte	ACSL1
0	3.03559	0.989	0.498	0	M-MDSC/FCGR3B+ monocyte	SRGN
0	3.03259	0.645	0.168	0	M-MDSC/FCGR3B+ monocyte	BCL2A1
0	3.00375	0.998	0.802	0	M-MDSC/FCGR3B+ monocyte	FTH1
0	2.86522	0.504	0.161	0	M-MDSC/FCGR3B+ monocyte	LYN
0	2.86099	0.964	0.818	0	M-MDSC/FCGR3B+ monocyte	H3F3A
0	2.82474	0.994	0.806	0	M-MDSC/FCGR3B+ monocyte	NEAT1
1.04e-269	2.81544	0.711	0.441	5.23e-265	M-MDSC/FCGR3B+ monocyte	GLUL
1.04e-267	3.31731	0.6	0.282	5.26e-263	M-MDSC/FCGR3B+ monocyte	ANP32A
7.54e-225	2.93341	0.538	0.242	3.8e-220	M-MDSC/FCGR3B+ monocyte	CD55
0	4.34429	0.837	0.333	0	Proliferating immune cell	HIST1H4C
0	4.0158	0.968	0.244	0	Proliferating immune cell	HMGB2
0	3.91686	0.977	0.256	0	Proliferating immune cell	STMN1
0	3.04076	0.878	0.112	0	Proliferating immune cell	GZMA
0	3.00536	0.743	0.017	0	Proliferating immune cell	TOP2A
0	2.96698	0.94	0.46	0	Proliferating immune cell	TUBB
0	2.86777	0.708	0.014	0	Proliferating immune cell	MKI67
0	2.79554	0.968	0.53	0	Proliferating immune cell	HMGN2
0	2.79259	0.862	0.099	0	Proliferating immune cell	NKG7
0	2.75461	0.721	0.024	0	Proliferating immune cell	NUSAP1
0	2.68903	0.67	0.031	0	Proliferating immune cell	CENPF
0	2.68855	0.968	0.621	0	Proliferating immune cell	TUBA1B
0	2.68558	0.497	0.037	0	Proliferating immune cell	GZMB
0	2.61027	0.805	0.178	0	Proliferating immune cell	CRIP1
0	2.59814	0.61	0.087	0	Proliferating immune cell	GZMK
0	2.58441	0.913	0.258	0	Proliferating immune cell	CORO1A
0	2.56567	0.983	0.689	0	Proliferating immune cell	PFN1
0	2.5277	0.969	0.548	0	Proliferating immune cell	H2AFZ
0	2.47211	0.692	0.076	0	Proliferating immune cell	PTTG1
0	2.44473	0.68	0.054	0	Proliferating immune cell	TYMS
0	2.44168	0.893	0.359	0	Proliferating immune cell	H2AFV
0	2.44042	0.467	0.031	0	Proliferating immune cell	IFNG
0	2.41734	0.597	0.023	0	Proliferating immune cell	KIAA0101
0	2.39964	0.633	0.013	0	Proliferating immune cell	UBE2C
0	2.38999	0.263	0.005	0	Proliferating immune cell	HIST1H3B
0	2.38802	0.995	0.769	0	Proliferating immune cell	HMGB1
0	2.35514	0.877	0.232	0	Proliferating immune cell	PSMB9
0	2.34487	0.821	0.13	0	Proliferating immune cell	RAC2
0	2.32164	0.877	0.176	0	Proliferating immune cell	IL32
0	2.30895	0.342	0.008	0	Proliferating immune cell	HIST1H1B
0	2.27574	0.554	0.011	0	Proliferating immune cell	ASPM
0	2.27145	0.784	0.106	0	Proliferating immune cell	CD3D
0	2.22041	0.64	0.135	0	Proliferating immune cell	PCNA
0	2.18469	0.617	0.014	0	Proliferating immune cell	BIRC5
0	2.15067	0.56	0.009	0	Proliferating immune cell	RRM2
0	2.14985	0.744	0.159	0	Proliferating immune cell	SMC4
0	2.146	0.757	0.154	0	Proliferating immune cell	CKS1B
0	2.08469	0.751	0.116	0	Proliferating immune cell	C12orf75
0	2.06873	0.877	0.162	0	Proliferating immune cell	CCL5
0	2.01882	0.845	0.353	0	Proliferating immune cell	CALM3
0	1.98479	0.904	0.342	0	Proliferating immune cell	ARHGDIB
0	1.97825	0.77	0.106	0	Proliferating immune cell	CD2
0	1.95392	0.921	0.504	0	Proliferating immune cell	COX8A
0	1.95251	0.274	0.01	0	Proliferating immune cell	FXYD2
0	1.92715	0.69	0.168	0	Proliferating immune cell	TMPO
0	1.92336	0.74	0.239	0	Proliferating immune cell	ANP32E
0	1.91739	0.272	0.036	0	Proliferating immune cell	HIST1H3D
0	1.91214	0.635	0.177	0	Proliferating immune cell	HN1
0	1.9097	0.863	0.459	0	Proliferating immune cell	DEK
4.14e-304	2.15248	0.762	0.328	2.08e-299	Proliferating immune cell	DUT
0	4.99788	0.96	0.037	0	pDC	GZMB
0	4.92746	0.804	0.003	0	pDC	IGJ
0	4.02634	0.91	0.1	0	pDC	IRF7
0	3.9703	0.917	0.049	0	pDC	PLAC8
0	3.45197	0.499	0.001	0	pDC	TCL1A
0	3.42809	0.839	0.003	0	pDC	LILRA4
0	3.38804	0.852	0.023	0	pDC	CLIC3
0	3.31276	0.945	0.287	0	pDC	PPP1R14B
0	3.18875	0.887	0.116	0	pDC	C12orf75
0	3.14161	0.882	0.109	0	pDC	PLD4
0	3.05997	0.7	0.021	0	pDC	IRF4
0	3.00997	0.912	0.259	0	pDC	GPR183
0	2.92079	0.799	0.007	0	pDC	MZB1
0	2.87355	0.82	0.01	0	pDC	SPIB
0	2.84791	0.907	0.224	0	pDC	ALOX5AP
0	2.83846	0.86	0.14	0	pDC	IRF8
0	2.80277	0.76	0.001	0	pDC	LRRC26
0	2.75444	0.804	0.042	0	pDC	IL3RA
0	2.72548	0.757	0.009	0	pDC	DERL3
0	2.65088	0.674	0.005	0	pDC	SCT
0	2.60495	0.88	0.277	0	pDC	CCDC50
0	2.60405	0.691	0.048	0	pDC	TSPAN13
0	2.57798	0.872	0.312	0	pDC	ITM2C
0	2.56535	0.869	0.288	0	pDC	RGS2
0	2.50478	0.958	0.555	0	pDC	SEC61B
0	2.35088	0.712	0.018	0	pDC	BCL11A
0	2.32715	0.674	0.077	0	pDC	LTB
0	2.20461	0.837	0.211	0	pDC	PLP2
0	2.16861	0.732	0.068	0	pDC	MPEG1
0	2.11152	0.611	0.002	0	pDC	PTCRA
0	2.11025	0.644	0.019	0	pDC	SMPD3
0	2.09584	0.651	0.139	0	pDC	GPR65
0	2.08397	0.712	0.053	0	pDC	SELL
0	2.06768	0.744	0.117	0	pDC	CYB561A3
0	2.06255	0.864	0.225	0	pDC	VAMP8
0	2.00384	0.794	0.241	0	pDC	UGCG
0	1.98297	0.639	0.114	0	pDC	RAB11FIP1
0	1.94689	0.74	0.133	0	pDC	RNASE6
0	1.92856	0.512	0.049	0	pDC	EGLN3
0	1.8528	0.639	0.064	0	pDC	AMICA1
0	1.82242	0.739	0.122	0	pDC	UCP2
0	1.81587	0.657	0.117	0	pDC	TRAF4
1.11e-304	2.32923	0.973	0.534	5.59e-300	pDC	CYBA
1.84e-252	1.92615	0.872	0.413	9.25e-248	pDC	ERP29
1.41e-249	2.1981	0.913	0.493	7.11e-245	pDC	HERPUD1
2.13e-245	1.96417	0.9	0.479	1.07e-240	pDC	SPCS1
2.03e-147	1.88372	0.817	0.434	1.02e-142	pDC	TXN
3.17e-134	1.93826	0.702	0.326	1.59e-129	pDC	CREM
1.04e-96	2.076	0.657	0.349	5.24e-92	pDC	SOX4
5.44e-19	1.88238	0.296	0.18	2.74e-14	pDC	PTGDS
0	7.57527	0.931	0.003	0	CCL21+ endothelial cell	CCL21
0	5.30345	0.95	0.022	0	CCL21+ endothelial cell	TFF3
0	4.87226	0.778	0.027	0	CCL21+ endothelial cell	FABP4
0	4.48693	0.92	0.024	0	CCL21+ endothelial cell	MMRN1
0	3.5726	0.962	0.248	0	CCL21+ endothelial cell	GNG11
0	3.51433	0.87	0.193	0	CCL21+ endothelial cell	FABP5
0	3.50412	0.548	0.03	0	CCL21+ endothelial cell	CAVIN2
0	3.49042	0.905	0.058	0	CCL21+ endothelial cell	CLDN5
0	3.48534	0.939	0.239	0	CCL21+ endothelial cell	TFPI
0	3.1902	0.891	0.047	0	CCL21+ endothelial cell	ECSCR
0	2.90186	0.82	0.059	0	CCL21+ endothelial cell	PROX1
0	2.75191	0.693	0.079	0	CCL21+ endothelial cell	EFEMP1
0	2.73382	0.901	0.23	0	CCL21+ endothelial cell	PPFIBP1
0	2.71557	0.908	0.159	0	CCL21+ endothelial cell	RAMP2
0	2.66607	0.917	0.191	0	CCL21+ endothelial cell	CAV1
0	2.63438	0.643	0.056	0	CCL21+ endothelial cell	LYVE1
0	2.62312	0.818	0.147	0	CCL21+ endothelial cell	NR2F1
0	2.50738	0.799	0.102	0	CCL21+ endothelial cell	PDPN
0	2.376	0.825	0.158	0	CCL21+ endothelial cell	HYAL2
0	2.34911	0.832	0.098	0	CCL21+ endothelial cell	EGFL7
0	2.30877	0.856	0.191	0	CCL21+ endothelial cell	ELK3
0	2.16457	0.688	0.067	0	CCL21+ endothelial cell	SNCG
0	2.12667	0.747	0.036	0	CCL21+ endothelial cell	PGM5
0	2.11974	0.851	0.175	0	CCL21+ endothelial cell	ARHGAP29
0	2.05436	0.764	0.038	0	CCL21+ endothelial cell	KANK3
0	2.0025	0.766	0.089	0	CCL21+ endothelial cell	GJA1
0	2.00092	0.645	0.094	0	CCL21+ endothelial cell	ANGPT2
0	1.85783	0.709	0.064	0	CCL21+ endothelial cell	SMAD1
0	1.84107	0.69	0.018	0	CCL21+ endothelial cell	TBX1
0	1.83519	0.508	0.027	0	CCL21+ endothelial cell	DSP
0	1.80683	0.716	0.018	0	CCL21+ endothelial cell	FLT4
0	1.77585	0.678	0.036	0	CCL21+ endothelial cell	ROBO4
0	1.77256	0.721	0.119	0	CCL21+ endothelial cell	LMO2
0	1.77222	0.704	0.094	0	CCL21+ endothelial cell	FXYD6
1.77e-303	2.15267	0.839	0.182	8.9e-299	CCL21+ endothelial cell	PRSS23
4.83e-273	2.17958	0.882	0.237	2.43e-268	CCL21+ endothelial cell	TM4SF1
7.03e-271	1.81892	0.754	0.167	3.54e-266	CCL21+ endothelial cell	PDLIM1
3.68e-233	2.76578	0.875	0.289	1.86e-228	CCL21+ endothelial cell	AKAP12
2.98e-230	1.96203	0.846	0.257	1.5e-225	CCL21+ endothelial cell	STMN1
9.5e-221	2.41306	0.407	0.059	4.78e-216	CCL21+ endothelial cell	SDPR
3.57e-215	1.82342	0.827	0.288	1.8e-210	CCL21+ endothelial cell	RAB11A
2.26e-214	2.0095	0.969	0.478	1.14e-209	CCL21+ endothelial cell	ANXA2
9.76e-211	2.59411	0.279	0.029	4.91e-206	CCL21+ endothelial cell	CCN1
1.48e-208	2.14172	0.922	0.352	7.44e-204	CCL21+ endothelial cell	TIMP3
4.07e-206	1.85582	0.967	0.395	2.05e-201	CCL21+ endothelial cell	S100A10
4.59e-171	2.08851	0.702	0.198	2.31e-166	CCL21+ endothelial cell	CLU
2.25e-151	1.85584	0.91	0.495	1.13e-146	CCL21+ endothelial cell	HSPB1
7.45e-115	1.96164	0.835	0.431	3.75e-110	CCL21+ endothelial cell	FKBP1A
1.87e-94	1.78478	0.645	0.257	9.42e-90	CCL21+ endothelial cell	RGS16
4.94e-86	2.02267	0.558	0.231	2.49e-81	CCL21+ endothelial cell	ATP5F1E
