# Supplementary material for: Single-cell tumor microenvironment profiling informs a circulating proteome test for the interception of malignant transformation in NF1 nerve sheath tumors
Source: Research Square preprint supplement (doi:10.21203/rs.3.rs-6865989/v1), 2025-06-18
Supplement: Supplementary file 3 [file d7fdbcafc6fcf473c566e1ab.xlsx]

## Sheet: Sheet1
Supplementary Table 1. Cohort of patient specimens used to build the single-cell atlas
TumorID	Pathology1	Pathology2	Collection	Age	Location	Gender	Lanes captured	Number of cells captured	participant_id	sample_id	10x Chemistry version
CS022514	ANF	ANF	Resection	41	Extremity	Male	8	40769	08C0079-236	08C0079-236-02	Single Cell 3' v2
CS023066	ANF	ANF	Resection	17	Head/neck	Female	8	44458	08C0079-068	08C0079-068-01-B	Single Cell 3' v2
CS024097_Tumor1	PNF	PNF	Resection	25	Trunk/extremity	Female	4	13653	08C0079-152	08C0079-152-04	Single Cell 3' v2
CS024097_Tumor2	PNF	PNF	Resection	25	Trunk/extremity	Female	3	4596	08C0079-152	08C0079-152-05	Single Cell 3' v2
CS024467	MPNST	MPNST	Biopsy	10	Trunk	Female	2	14197	10C0086-757	10C0086-757-01-A	Single Cell 3' v2
CS024684	MPNST	MPNST	Resection	10	Trunk	Female	4	13587	10C0086-757	10C0086-757-01-A	Single Cell 3' v2
CS025345_A	ANF	ANF	Biopsy	35	Trunk/extremity	Male	1	2726	10C0086-796	10C0086-796-01	Single Cell 3' v3
CS025345_B	ANF	ANNUBP	Biopsy	35	Extremity	Male	1	3334	10C0086-796	10C0086-796-01-B	Single Cell 3' v3
CS025345_C	ANF	ANNUBP	Biopsy	35	Extremity	Male	1	3549	10C0086-796	10C0086-796-01-B	Single Cell 3' v3
CS025345_D	ANF	ANF	Biopsy	35	Trunk/extremity	Male	1	4004	10C0086-796	10C0086-796-01	Single Cell 3' v3
CS025345_E	ANF	ANF	Biopsy	35	Trunk/extremity	Male	1	2261	10C0086-796	10C0086-796-01	Single Cell 3' v3
CS025345_F	ANF	ANNUBP	Biopsy	35	Extremity	Male	1	4378	10C0086-796	10C0086-796-01-B	Single Cell 3' v3
CS026098_LK	PNF	PNF	Biopsy	45	Extremity	Female	1	14678	08C0079-242	08C0079-242-01	Single Cell 3' v3
CS026098_RAU	ANF	ANNUBP	Biopsy	45	Extremity	Female	1	521	08C0079-242	08C0079-242-04	Single Cell 3' v3
CS026099_U	ANF	ANNUBP	Resection	19	Extremity	Male	1	5146	10C0086-551	10C0086-551-01-A	Single Cell 3' v3
CS026362_RGS	ANF	ANF	Resection	32	Extremity	Female	2	4408	08C0079-032	08C0079-032-15	Single Cell 3' v3
CS026362_RGL	ANF	ANF	Resection	32	Extremity	Female	2	5515	08C0079-032	08C0079-032-15	Single Cell 3' v3
CS026362_LC	ANF	ANF	Resection	32	Trunk	Female	2	5987	08C0079-032	08C0079-032-17B	Single Cell 3' v3
CS026362_LA	ANF	ANF	Resection	32	Trunk	Female	2	4796	08C0079-032	08C0079-032-17A	Single Cell 3' v3
CS026364_RA	PNF	PNF	Biopsy	45	Extremity	Female	1	11437	08C0079-242	08C0079-242-04	Single Cell 3' v3
CS026364_LK	PNF	PNF	Biopsy	45	Extremity	Female	1	655	08C0079-242	08C0079-242-01	Single Cell 3' v3
CS026527	PNF	PNF	Biopsy	17	Trunk/extremity	Male	1	7523	08C0079-011	08C0079-011-01	Single Cell 3' v3
CS026570_T1	ANF	ANNUBP	Resection	20	Trunk	Female	2	14931	08C0079-237	08C0079-237-01-B	Single Cell 3' v3
CS026570_T2	PNF	PNF	Resection	20	Trunk	Female	2	20982	08C0079-237	08C0079-237-01-F	Single Cell 3' v3
CS026570_T3	ANF	ANF	Resection	20	Trunk	Female	2	15248	08C0079-237	08C0079-237-01	Single Cell 3' v3
CS026570_T4	PNF	PNF	Resection	20	Trunk	Female	2	14220	08C0079-237	08C0079-237-01-G	Single Cell 3' v3
CS026570_T5	PNF	PNF	Resection	20	Trunk	Female	1	6683	08C0079-237	08C0079-237-01	Single Cell 3' v3
CS026570_CT	PNF	PNF	Resection	20	Trunk	Female	1	5922	08C0079-237	08C0079-237-01	Single Cell 3' v3
CS026618	ANF	ANF	Resection	16	Trunk	Male	2	10143	08C0079-127	08C0079-127-01-B	Single Cell 3' v3
CS027286	MPNST	MPNST	Resection	11	Trunk	Female	7	47442	10C0086-757	10C0086-757-02	Single Cell 3' v3
CS027380	PNF	PNF	Resection	13	Extremity	Female	1	4807	08C0079-110	08C0079-110-01-B	Single Cell 3' v3
CS028798_HaSa_pre	PNF	PNF	Biopsy	23	Head/neck	Female	1	1953	10C0086-919	10C0086-919-01	Single Cell 3' v3.1
CS028798_AlLe	ANF	ANF	Resection	21	Trunk	Male	2	14777	08C0079-228	08C0079-228-02-B	Single Cell 3' v3.1
CS028798_HaSa_post	PNF	PNF	Biopsy	23	Head/neck	Female	1	657	10C0086-919	10C0086-919-01	Single Cell 3' v3.1
CS028799	MPNST	MPNST	Resection	12	Trunk	Male	4	16321	10C0086-848	10C0086-848-02	Single Cell 3' v3.1
CS028933_Tumor2_cPN	PNF	PNF	Resection	13	Head	Female	1	1016	10C0086-878	10C0086-878-02	Single Cell 3' v3.1
CS028933_Tumor1_PN	PNF	PNF	Resection	13	Trunk	Female	2	7269	10C0086-878	10C0086-878-03	Single Cell 3' v3.1
CS029329	PNF	PNF	Resection	27	Trunk	Female	2	6022	08C0079-152	08C0079-152-06	Single Cell 3' v3.1
CS029658	PNF	PNF	Resection	13	Extremity	Male	2	7833	10C0086-891	10C0086-891-01	Single Cell 3' v3.1
CS029900_Tumor1	PNF	PNF	Resection	12	Trunk	Female	2	11176	08C0079-116	08C0079-116-01-C	Single Cell 3' v3.1
CS029900_Tumor3	PNF	PNF	Resection	12	Trunk	Female	2	12408	08C0079-116	08C0079-116-01-A	Single Cell 3' v3.1
CS029900_Tumor4	PNF	PNF	Resection	12	Extremity	Female	2	11179	08C0079-116	08C0079-116-01-B	Single Cell 3' v3.1
CS029952_Tumor3.1	PNF	PNF	Resection	17	Trunk	Female	2	6071	08C0079-229	08C0079-229-01-E	Single Cell 3' v3.1
CS029952_Tumor3.2	PNF	PNF	Resection	17	Trunk	Female	2	5170	08C0079-229	08C0079-229-01-E	Single Cell 3' v3.1
CS029952_Tumor4	PNF	PNF	Resection	17	Trunk	Female	2	7335	08C0079-229	08C0079-229-01-F	Single Cell 3' v3.1
CS030668_CCDI_20210823_Tumor1	ANF	ANNUBP	Resection	15	Trunk	Male	2	27790	08C0079-097	08C0079-097-01-A	Single Cell 3' v3.1
CS030668_CCDI_20210823_Tumor2	PNF	PNF	Resection	15	Trunk	Male	2	7748	08C0079-097	08C0079-097-01-B	Single Cell 3' v3.1
CS030668_CCDI_20210910_PN	ANF	ANNUBP	Resection	47	Extremity	Female	2	16225	08C0079-242	08C0079-242-05	Single Cell 3' v3.1
CS031062_CCDI_ANF	ANF	ANF	Biopsy	32	Extremity	Female	2	10653	08C0079-153	08C0079-153-07	Single Cell 3' v3.1
CS031369_CCDI_NF1-1	PNF	PNF	Biopsy	51	Trunk	Male	1	1715	10C0086-475	10C0086-475-01	Single Cell 3' v3.1
CS031370_CCDI_NF1-2	ANF	ANF	Biopsy	32	Extremity	Female	1	724	08C0079-153	08C0079-153-07	Single Cell 3' v3.1
CS031518_CCDI_NF1	ANF	ANNUBP	Biopsy	35	Trunk	Female	2	9749	08C0079-032	08C0079-032-19	Single Cell 3' v3.1
CS031748_CCDI_NF1	ANF	ANF	Resection	14	Trunk	Male	2	5257	08C0079-238	08C0079-238-01-A	Single Cell 3' v3.1
CS031750_CCDI_NF1	MPNST	MPNST	Resection	35	Trunk	Female	2	9775	08C0079-032	08C0079-032-19	Single Cell 3' v3.1
CS031751_CCDI_NF1	ANF	ANF	Biopsy	17	Trunk	Female	2	6027	10C0086-920	10C0086-920-01	Single Cell 3' v3.1
