# Supplementary material for: Single-cell tumor microenvironment profiling informs a circulating proteome test for the interception of malignant transformation in NF1 nerve sheath tumors
Source: Research Square preprint supplement (doi:10.21203/rs.3.rs-6865989/v1), 2025-06-18
Supplement: Supplementary file 4 [file dfc209a0c7097ff9df49b675.xlsx]

## Sheet: Supplementary Table 3
	Supplementary Table 3. Cohort of plasma samples used in the proteomic study
	Sample	Diagnosis	Subject Age	Subject Sex	Matched scRNAseq Lesion ID
	prot001	AN	16	F	NA
	prot002	AN	22	M	NA
	prot003	AN	21	M	NA
	prot004	AN	38	M	NA
	prot005	AN	16	F	NA
	prot006	AN	16	M	NA
	prot007	AN	47	F	NA
	prot008	AN	47	F	NA
	prot009	AN	21	M	NA
	prot010	AN	36	F	08C0079-032-05, 08C0079-032-21
	prot011	AN	21	F	10C0086-972-01
	prot012	AN	32	F	NA
	prot013	AN	17	F	10C0086-920-01
	prot014	AN	22	M	08C0079-121-01-C
	prot015	AN	21	F	NA
	prot016	AN	12	F	NA
	prot017	AN	32	F	08C0079-153-07
	prot018	AN	14	F	NA
	prot019	AN	21	M	NA
	prot020	AN	20	F	NA
	prot021	AN	13	F	10C0086-878-03, 10C0086-878-02
	prot022	AN	13	M	NA
	prot023	AN	16	F	NA
	prot024	AN	33	F	NA
	prot025	AN	21	M	NA
	prot026	Healthy	32	F	NA
	prot027	Healthy	32	F	NA
	prot028	Healthy	35	M	NA
	prot029	Healthy	51	F	NA
	prot030	Healthy	32	F	NA
	prot031	Healthy	25	M	NA
	prot032	Healthy	30	F	NA
	prot033	Healthy	32	F	NA
	prot034	Healthy	51	M	NA
	prot035	Healthy	32	F	NA
	prot036	MPNST	39	M	NA
	prot037	MPNST	48	M	NA
	prot038	MPNST	48	M	NA
	prot039	MPNST	48	M	NA
	prot040	MPNST	NR	NR	NA
	prot041	MPNST	11	F	NA
	prot042	MPNST	12	M	NA
	prot043	MPNST	48	M	NA
	prot044	MPNST	NR	NR	NA
	prot045	MPNST	NR	NR	NA
	prot046	MPNST	39	M	NA
	prot047	MPNST	45	M	NA
	prot048	MPNST	45	M	NA
	prot049	MPNST	26	M	NA
	prot050	MPNST	17	M	NA
	prot051	MPNST	17	M	NA
	prot052	MPNST	17	F	NA
	prot053	MPNST	42	F	NA
	prot054	MPNST	17	F	NA
	prot055	MPNST	17	F	NA
	prot056	MPNST	72	M	NA
	prot057	MPNST	72	M	NA
	prot058	MPNST	31	M	NA
	prot059	MPNST	31	M	NA
	prot060	MPNST	NR	NR	NA
	prot061	MPNST	49	F	NA
	prot062	MPNST	36	F	NA
	prot063	MPNST	36	F	NA
	prot064	MPNST	36	F	NA
	prot065	MPNST	32	F	NA
	prot066	MPNST	NR	NR	NA
	prot067	MPNST	46	M	NA
	prot068	MPNST	46	M	NA
	prot069	MPNST	NR	NR	NA
	prot070	MPNST	NR	NR	NA
	prot071	MPNST	NR	NR	NA
	prot072	MPNST	NR	NR	NA
	prot073	MPNST	NR	NR	NA
	prot074	MPNST	12	M	NA
	prot075	MPNST	10	F	NA
	prot076	MPNST	49	M	NA
	prot077	MPNST	48	M	NA
	prot078	MPNST	49	M	NA
	prot079	MPNST	17	M	NA
	prot080	MPNST	17	M	NA
	prot081	MPNST	12	M	NA
	prot082	MPNST	NR	NR	NA
	prot083	MPNST	NR	NR	NA
	prot084	MPNST	40	F	NA
	prot085	MPNST	NR	NR	NA
	prot086	MPNST	16	M	NA
	prot087	MPNST	48	M	NA
	prot088	MPNST	65	F	NA
	prot089	MPNST	65	F	NA
	prot090	PN	8	F	NA
	prot091	PN	18	M	NA
	prot092	PN	21	M	NA
	prot093	PN	20	F	NA
	prot094	PN	29	M	NA
	prot095	PN	14	M	NA
	prot096	PN	21	F	NA
	prot097	PN	24	F	10C0086-1004-03, 10C0086-1004-04
	prot098	PN	19	F	08C0079-229-02-A, 08C0079-229-02-B
	prot099	PN	24	M	NA
	prot100	PN	23	M	NA
	prot101	PN	11	F	NA
	prot102	PN	13	F	NA
	prot103	PN	21	M	NA
	prot104	PN	45	M	NA
	prot105	PN	22	F	NA
	prot106	PN	29	F	NA
	prot107	PN	22	M	NA
	prot108	PN	28	F	NA
	prot109	PN	20	F	NA
	prot110	PN	22	M	NA
	prot111	PN	17	M	NA
	prot112	PN	23	F	NA
	prot113	PN	18	F	NA
	prot114	PN	19	M	NA
	prot115	PN	19	M	NA
	prot116	PN	13	M	NA
	prot117	PN	14	F	NA
	prot118	PN	18	M	NA
	AN, atypical neurofibroma; F, female; NR, not recorded; NA, not applicable; PN, plexiform neurofibroma; M, male; MPNST, malignant peripheral nerve sheath tumor
